# Supplementary material for: Phylogenetic Triage and Risk Assessment: How to Predict Emerging Phytoplasma Diseases
Source: Preprints.org preprint supplement (doi:10.20944/preprints202304.0520.v1), 2023-04-18
Supplement: Supplementary file 3 [file SupplementaryTables_S1-S2-S3.xlsx]

## Sheet: Table S1
Table S1. Taxonomic composition of the Hemiptera Auchenorrhyncha assemblages in 76 insect samples (40 in crop fields from Labber (LA) and Gloon (Go) macroareas and 36 from grasslands from Upper Palatine Forest (VOW) and Chiemgau (CH) macroareas), from 56 locations in the Bavarian region and collected during 3 sampling periods (1, June; 2, July; 3: September). COI family level or lower metabarcodi…
Sample code	# sample	# site	Position of trap	Date	Habitat	Region	Sampling period	Family	Genus	Species
574-70-M	574	70	M	12.06.2020	grassland	CH	1	Cicadellidae	Macrosteles	sexnotatus
575-71-M	575	71	M	12.06.2020	grassland	CH	1	Aphrophoridae
439-39-M	439	39	M	03.06.2020	grassland	VOW	1	Cicadellidae	Eupteryx	atropunctata
454-44-M	454	44	M	03.06.2020	grassland	VOW	1	Cicadellidae	Oncopsis
454-44-M	454	44	M	03.06.2020	grassland	VOW	1	Cicadellidae	Oncopsis
454-44-M	454	44	M	03.06.2020	grassland	VOW	1	Cicadellidae	Eupteryx	atropunctata
454-44-M	454	44	M	03.06.2020	grassland	VOW	1	Cicadellidae
460-46-M	460	46	M	03.06.2020	grassland	VOW	1	Cicadellidae	Empoasca	decipiens
466-48-M	466	48	M	03.06.2020	grassland	VOW	1	Aphrophoridae
466-48-M	466	48	M	03.06.2020	grassland	VOW	1	Cicadellidae	Eupteryx	atropunctata
475-51-M	475	51	M	03.06.2020	grassland	VOW	1	Cicadellidae	Eupteryx	atropunctata
475-51-M	475	51	M	03.06.2020	grassland	VOW	1	Cicadellidae	Empoasca	decipiens
478-52-M	478	52	M	03.06.2020	grassland	VOW	1	Cicadellidae	Eupteryx	atropunctata
914-F7-M	914	F7	M	09.06.2020	crop field	GO	1	Cicadellidae	Empoasca
917-F9-W	917	F9	W	09.06.2020	crop field	GO	1	Cicadellidae	Empoasca	decipiens
920-F10-M	920	F10	M	09.06.2020	crop field	GO	1	Delphacidae
845-F3-W	845	F3	W	03.06.2020	crop field	LA	1	Cixiidae	Cixius
853-F7-W	853	F7	W	03.06.2020	crop field	LA	1	Cicadellidae	Macrosteles
860-F10-M	860	F10	M	03.06.2020	crop field	LA	1	Cicadellidae	Oncopsis
860-F10-M	860	F10	M	03.06.2020	crop field	LA	1	Cicadellidae	Eupteryx	atropunctata
631-55-M	631	55	M	08.07.2020	grassland	CH	2	Delphacidae
634-56-M	634	56	M	08.07.2020	grassland	CH	2	Delphacidae	Muellerianella
634-56-M	634	56	M	08.07.2020	grassland	CH	2	Delphacidae
634-56-M	634	56	M	08.07.2020	grassland	CH	2	Cicadellidae	Macrosteles	sexnotatus
637-57-M	637	57	M	08.07.2020	grassland	CH	2	Cicadellidae
637-57-M	637	57	M	08.07.2020	grassland	CH	2	Aphrophoridae	Aphrophora
637-57-M	637	57	M	08.07.2020	grassland	CH	2	Aphrophoridae	Aphrophora	salicina
637-57-M	637	57	M	08.07.2020	grassland	CH	2	Cicadellidae
637-57-M	637	57	M	08.07.2020	grassland	CH	2	Cicadellidae
637-57-M	637	57	M	08.07.2020	grassland	CH	2	Cixiidae
640-58-M	640	58	M	08.07.2020	grassland	CH	2	Delphacidae	Muellerianella
640-58-M	640	58	M	08.07.2020	grassland	CH	2	Cicadellidae	Empoasca
640-58-M	640	58	M	08.07.2020	grassland	CH	2	Cicadellidae
643-59-M	643	59	M	08.07.2020	grassland	CH	2	Cicadellidae
643-59-M	643	59	M	08.07.2020	grassland	CH	2	Delphacidae	Muellerianella
643-59-M	643	59	M	08.07.2020	grassland	CH	2	Cicadellidae
646-60-M	646	60	M	08.07.2020	grassland	CH	2	Cicadellidae
646-60-M	646	60	M	08.07.2020	grassland	CH	2	Delphacidae	Muellerianella
649-61-M	649	61	M	08.07.2020	grassland	CH	2	Delphacidae
649-61-M	649	61	M	08.07.2020	grassland	CH	2	Delphacidae	Muellerianella
649-61-M	649	61	M	08.07.2020	grassland	CH	2	Cicadellidae
649-61-M	649	61	M	08.07.2020	grassland	CH	2	Cicadellidae
649-61-M	649	61	M	08.07.2020	grassland	CH	2	Cicadellidae
649-61-M	649	61	M	08.07.2020	grassland	CH	2	Delphacidae	Kosswigianella
652-62-M	652	62	M	08.07.2020	grassland	CH	2	Delphacidae
652-62-M	652	62	M	08.07.2020	grassland	CH	2	Cicadellidae	Anoscopus	serratulae
652-62-M	652	62	M	08.07.2020	grassland	CH	2	Cicadellidae
652-62-M	652	62	M	08.07.2020	grassland	CH	2	Cicadellidae
655-63-M	655	63	M	08.07.2020	grassland	CH	2	Cicadellidae	Idiocerus
655-63-M	655	63	M	08.07.2020	grassland	CH	2	Cicadellidae	Psammotettix
655-63-M	655	63	M	08.07.2020	grassland	CH	2	Cicadellidae	Deltocephalus	pulicaris
655-63-M	655	63	M	08.07.2020	grassland	CH	2	Cicadellidae
655-63-M	655	63	M	08.07.2020	grassland	CH	2	Cicadellidae
655-63-M	655	63	M	08.07.2020	grassland	CH	2	Delphacidae	Laodelphax
661-65-M	661	65	M	08.07.2020	grassland	CH	2	Delphacidae
661-65-M	661	65	M	08.07.2020	grassland	CH	2	Cicadellidae
664-66-M	664	66	M	08.07.2020	grassland	CH	2	Cicadellidae	Empoasca	luda
664-66-M	664	66	M	08.07.2020	grassland	CH	2	Cicadellidae
664-66-M	664	66	M	08.07.2020	grassland	CH	2	Cicadellidae	Macropsis
664-66-M	664	66	M	08.07.2020	grassland	CH	2	Delphacidae
664-66-M	664	66	M	08.07.2020	grassland	CH	2	Cicadellidae	Ribautiana	debilis
667-67-M	667	67	M	08.07.2020	grassland	CH	2	Cicadellidae
667-67-M	667	67	M	08.07.2020	grassland	CH	2	Cicadellidae	Oncopsis	tristis
667-67-M	667	67	M	08.07.2020	grassland	CH	2	Cicadellidae	Macropsis
667-67-M	667	67	M	08.07.2020	grassland	CH	2	Cicadellidae	Alebra
667-67-M	667	67	M	08.07.2020	grassland	CH	2	Cicadellidae	Macrosteles
670-68-M	670	68	M	08.07.2020	grassland	CH	2	Delphacidae
670-68-M	670	68	M	08.07.2020	grassland	CH	2	Cicadellidae
673-69-M	673	69	M	08.07.2020	grassland	CH	2	Cicadellidae	Cicadella	viridis
673-69-M	673	69	M	08.07.2020	grassland	CH	2	Cicadellidae	Macrosteles
673-69-M	673	69	M	08.07.2020	grassland	CH	2	Cicadellidae
673-69-M	673	69	M	08.07.2020	grassland	CH	2	Cicadellidae	Alebra
673-69-M	673	69	M	08.07.2020	grassland	CH	2	Cicadellidae	Macrosteles	sexnotatus
673-69-M	673	69	M	08.07.2020	grassland	CH	2	Cicadellidae	Conosanus	obsoletus
673-69-M	673	69	M	08.07.2020	grassland	CH	2	Cicadellidae	Empoasca
673-69-M	673	69	M	08.07.2020	grassland	CH	2	Cicadellidae	Macropsis
676-70-M	676	70	M	08.07.2020	grassland	CH	2	Cicadellidae	Cicadella	viridis
676-70-M	676	70	M	08.07.2020	grassland	CH	2	Cicadellidae	Macrosteles
676-70-M	676	70	M	08.07.2020	grassland	CH	2	Cicadellidae	Macrosteles	sexnotatus
676-70-M	676	70	M	08.07.2020	grassland	CH	2	Delphacidae	Muellerianella
676-70-M	676	70	M	08.07.2020	grassland	CH	2	Cicadellidae	Typhlocyba	rosae
676-70-M	676	70	M	08.07.2020	grassland	CH	2	Cicadellidae	Empoasca
676-70-M	676	70	M	08.07.2020	grassland	CH	2	Cicadellidae	Empoasca	luda
679-71-M	679	71	M	08.07.2020	grassland	CH	2	Aphrophoridae	Aphrophora	alni
679-71-M	679	71	M	08.07.2020	grassland	CH	2	Aphrophoridae	Philaenus	spumarius
679-71-M	679	71	M	08.07.2020	grassland	CH	2	Cicadellidae	Macropsis
679-71-M	679	71	M	08.07.2020	grassland	CH	2	Aphrophoridae	Aphrophora
679-71-M	679	71	M	08.07.2020	grassland	CH	2	Aphrophoridae	Philaenus	spumarius
679-71-M	679	71	M	08.07.2020	grassland	CH	2	Cicadellidae
679-71-M	679	71	M	08.07.2020	grassland	CH	2	Cicadellidae
679-71-M	679	71	M	08.07.2020	grassland	CH	2	Cicadellidae	Typhlocyba
679-71-M	679	71	M	08.07.2020	grassland	CH	2	Delphacidae	Muellerianella
679-71-M	679	71	M	08.07.2020	grassland	CH	2	Cicadellidae
679-71-M	679	71	M	08.07.2020	grassland	CH	2	Cicadellidae	Cicadella	viridis
679-71-M	679	71	M	08.07.2020	grassland	CH	2	Cicadellidae	Empoasca	luda
679-71-M	679	71	M	08.07.2020	grassland	CH	2	Cixiidae
679-71-M	679	71	M	08.07.2020	grassland	CH	2	Aphrophoridae	Philaenus	spumarius
679-71-M	679	71	M	08.07.2020	grassland	CH	2	Cicadellidae	Macropsis	ocellata
679-71-M	679	71	M	08.07.2020	grassland	CH	2	Aphrophoridae	Aphrophora
682-72-M	682	72	M	08.07.2020	grassland	CH	2	Delphacidae
682-72-M	682	72	M	08.07.2020	grassland	CH	2	Aphrophoridae	Aphrophora	alni
577-37-M	577	37	M	06.07.2020	grassland	VOW	2	Cicadellidae
580-38-M	580	38	M	06.07.2020	grassland	VOW	2	Cicadellidae
580-38-M	580	38	M	06.07.2020	grassland	VOW	2	Cicadellidae	Empoasca	luda
583-39-M	583	39	M	06.07.2020	grassland	VOW	2	Cicadellidae	Empoasca
583-39-M	583	39	M	06.07.2020	grassland	VOW	2	Cicadellidae	Empoasca	luda
583-39-M	583	39	M	06.07.2020	grassland	VOW	2	Cicadellidae	Macropsis
583-39-M	583	39	M	06.07.2020	grassland	VOW	2	Cicadellidae	Empoasca	luda
583-39-M	583	39	M	06.07.2020	grassland	VOW	2	Cicadellidae	Psammotettix
583-39-M	583	39	M	06.07.2020	grassland	VOW	2	Cicadellidae
586-40-M	586	40	M	06.07.2020	grassland	VOW	2	Cicadellidae
586-40-M	586	40	M	06.07.2020	grassland	VOW	2	Cicadellidae	Empoasca
589-41-M	589	41	M	06.07.2020	grassland	VOW	2	Cicadellidae	Empoasca
589-41-M	589	41	M	06.07.2020	grassland	VOW	2	Cicadellidae
589-41-M	589	41	M	06.07.2020	grassland	VOW	2	Delphacidae	Laodelphax
592-42-M	592	42	M	06.07.2020	grassland	VOW	2	Cicadellidae
592-42-M	592	42	M	06.07.2020	grassland	VOW	2	Cicadellidae
592-42-M	592	42	M	06.07.2020	grassland	VOW	2	Cicadellidae	Empoasca
592-42-M	592	42	M	06.07.2020	grassland	VOW	2	Cicadellidae
592-42-M	592	42	M	06.07.2020	grassland	VOW	2	Cicadellidae
595-43-M	595	43	M	06.07.2020	grassland	VOW	2	Cicadellidae
595-43-M	595	43	M	06.07.2020	grassland	VOW	2	Cicadellidae
595-43-M	595	43	M	06.07.2020	grassland	VOW	2	Cicadellidae	Macropsis
595-43-M	595	43	M	06.07.2020	grassland	VOW	2	Cicadellidae
598-44-M	598	44	M	06.07.2020	grassland	VOW	2	Cicadellidae	Oncopsis
598-44-M	598	44	M	06.07.2020	grassland	VOW	2	Delphacidae	Laodelphax
598-44-M	598	44	M	06.07.2020	grassland	VOW	2	Cicadellidae	Empoasca	luda
598-44-M	598	44	M	06.07.2020	grassland	VOW	2	Cicadellidae	Empoasca
598-44-M	598	44	M	06.07.2020	grassland	VOW	2	Cicadellidae
601-45-M	601	45	M	06.07.2020	grassland	VOW	2	Cicadellidae	Empoasca	luda
601-45-M	601	45	M	06.07.2020	grassland	VOW	2	Cicadellidae
601-45-M	601	45	M	06.07.2020	grassland	VOW	2	Cicadellidae	Macropsis
601-45-M	601	45	M	06.07.2020	grassland	VOW	2	Cicadellidae	Empoasca
604-46-M	604	46	M	06.07.2020	grassland	VOW	2	Cicadellidae	Psammotettix
604-46-M	604	46	M	06.07.2020	grassland	VOW	2	Cicadellidae	Macropsis
604-46-M	604	46	M	06.07.2020	grassland	VOW	2	Cicadellidae	Empoasca	luda
604-46-M	604	46	M	06.07.2020	grassland	VOW	2	Cicadellidae	Empoasca	luda
607-47-M	607	47	M	06.07.2020	grassland	VOW	2	Cicadellidae	Alnetoidia	alneti
607-47-M	607	47	M	06.07.2020	grassland	VOW	2	Cicadellidae	Empoasca
607-47-M	607	47	M	06.07.2020	grassland	VOW	2	Cicadellidae
607-47-M	607	47	M	06.07.2020	grassland	VOW	2	Delphacidae	Laodelphax
607-47-M	607	47	M	06.07.2020	grassland	VOW	2	Cicadellidae	Empoasca
607-47-M	607	47	M	06.07.2020	grassland	VOW	2	Cicadellidae	Empoasca	luda
607-47-M	607	47	M	06.07.2020	grassland	VOW	2	Cicadellidae	Macropsis
610-48-M	610	48	M	06.07.2020	grassland	VOW	2	Cicadellidae	Cicadella	viridis
610-48-M	610	48	M	06.07.2020	grassland	VOW	2	Cicadellidae
610-48-M	610	48	M	06.07.2020	grassland	VOW	2	Cicadellidae	Macropsis	notata
610-48-M	610	48	M	06.07.2020	grassland	VOW	2	Aphrophoridae	Philaenus	spumarius
610-48-M	610	48	M	06.07.2020	grassland	VOW	2	Cicadellidae
610-48-M	610	48	M	06.07.2020	grassland	VOW	2	Cicadellidae	Empoasca	luda
613-49-M	613	49	M	06.07.2020	grassland	VOW	2	Cicadellidae
613-49-M	613	49	M	06.07.2020	grassland	VOW	2	Cicadellidae	Deltocephalus	pulicaris
613-49-M	613	49	M	06.07.2020	grassland	VOW	2	Cicadellidae	Typhlocyba
613-49-M	613	49	M	06.07.2020	grassland	VOW	2	Cicadellidae	Macropsis
616-50-M	616	50	M	06.07.2020	grassland	VOW	2	Cicadellidae	Macropsis
616-50-M	616	50	M	06.07.2020	grassland	VOW	2	Cicadellidae	Oncopsis
616-50-M	616	50	M	06.07.2020	grassland	VOW	2	Cicadellidae	Macropsis	ocellata
619-51-M	619	51	M	06.07.2020	grassland	VOW	2	Cicadellidae
619-51-M	619	51	M	06.07.2020	grassland	VOW	2	Cicadellidae	Macropsis
622-52-M	622	52	M	06.07.2020	grassland	VOW	2	Cicadellidae	Empoasca	luda
622-52-M	622	52	M	06.07.2020	grassland	VOW	2	Cicadellidae	Empoasca
622-52-M	622	52	M	06.07.2020	grassland	VOW	2	Cicadellidae
622-52-M	622	52	M	06.07.2020	grassland	VOW	2	Cicadellidae	Empoasca	luda
622-52-M	622	52	M	06.07.2020	grassland	VOW	2	Cicadellidae
622-52-M	622	52	M	06.07.2020	grassland	VOW	2	Cicadellidae
625-53-M	625	53	M	06.07.2020	grassland	VOW	2	Cicadellidae
625-53-M	625	53	M	06.07.2020	grassland	VOW	2	Delphacidae	Muellerianella
625-53-M	625	53	M	06.07.2020	grassland	VOW	2	Cixiidae	Cixius
625-53-M	625	53	M	06.07.2020	grassland	VOW	2	Cicadellidae
625-53-M	625	53	M	06.07.2020	grassland	VOW	2	Cicadellidae	Macropsis
625-53-M	625	53	M	06.07.2020	grassland	VOW	2	Cicadellidae	Empoasca	luda
628-54-M	628	54	M	06.07.2020	grassland	VOW	2	Cicadellidae
628-54-M	628	54	M	06.07.2020	grassland	VOW	2	Cicadellidae
628-54-M	628	54	M	06.07.2020	grassland	VOW	2	Cicadellidae	Cicadella	viridis
628-54-M	628	54	M	06.07.2020	grassland	VOW	2	Cicadellidae
628-54-M	628	54	M	06.07.2020	grassland	VOW	2	Cicadellidae	Idiocerus
628-54-M	628	54	M	06.07.2020	grassland	VOW	2	Cicadellidae
628-54-M	628	54	M	06.07.2020	grassland	VOW	2	Cicadellidae	Macropsis
628-54-M	628	54	M	06.07.2020	grassland	VOW	2	Cixiidae	Cixius
628-54-M	628	54	M	06.07.2020	grassland	VOW	2	Cicadellidae
1022-F1-M	1022	F1	M	03.07.2020	crop field	GO	2	Cicadellidae	Psammotettix
1022-F1-M	1022	F1	M	03.07.2020	crop field	GO	2	Delphacidae
1022-F1-M	1022	F1	M	03.07.2020	crop field	GO	2	Cicadellidae	Empoasca
1022-F1-M	1022	F1	M	03.07.2020	crop field	GO	2	Cicadellidae
1022-F1-M	1022	F1	M	03.07.2020	crop field	GO	2	Cicadellidae	Empoasca
1021-F1-W	1021	F1	W	03.07.2020	crop field	GO	2	Cicadellidae
1021-F1-W	1021	F1	W	03.07.2020	crop field	GO	2	Cicadellidae	Conosanus	obsoletus
1021-F1-W	1021	F1	W	03.07.2020	crop field	GO	2	Cicadellidae	Empoasca
1024-F2-M	1024	F2	M	03.07.2020	crop field	GO	2	Cicadellidae	Psammotettix
1024-F2-M	1024	F2	M	03.07.2020	crop field	GO	2	Cicadellidae
1024-F2-M	1024	F2	M	03.07.2020	crop field	GO	2	Cicadellidae	Empoasca
1023-F2-W	1023	F2	W	03.07.2020	crop field	GO	2	Cicadellidae	Psammotettix
1023-F2-W	1023	F2	W	03.07.2020	crop field	GO	2	Cicadellidae
1023-F2-W	1023	F2	W	03.07.2020	crop field	GO	2	Cicadellidae
1023-F2-W	1023	F2	W	03.07.2020	crop field	GO	2	Cicadellidae	Psammotettix
1023-F2-W	1023	F2	W	03.07.2020	crop field	GO	2	Cicadellidae	Ribautiana	debilis
1026-F3-M	1026	F3	M	03.07.2020	crop field	GO	2	Cicadellidae	Psammotettix
1026-F3-M	1026	F3	M	03.07.2020	crop field	GO	2	Cicadellidae	Macrosteles
1026-F3-M	1026	F3	M	03.07.2020	crop field	GO	2	Cicadellidae	Macropsis
1026-F3-M	1026	F3	M	03.07.2020	crop field	GO	2	Cicadellidae	Empoasca
1026-F3-M	1026	F3	M	03.07.2020	crop field	GO	2	Cicadellidae
1025-F3-W	1025	F3	W	03.07.2020	crop field	GO	2	Cicadellidae
1025-F3-W	1025	F3	W	03.07.2020	crop field	GO	2	Cicadellidae	Conosanus	obsoletus
1028-F4-M	1028	F4	M	03.07.2020	crop field	GO	2	Cicadellidae
1028-F4-M	1028	F4	M	03.07.2020	crop field	GO	2	Cicadellidae	Macrosteles
1028-F4-M	1028	F4	M	03.07.2020	crop field	GO	2	Cicadellidae	Psammotettix
1028-F4-M	1028	F4	M	03.07.2020	crop field	GO	2	Cicadellidae	Empoasca
1028-F4-M	1028	F4	M	03.07.2020	crop field	GO	2	Cicadellidae
1027-F4-W	1027	F4	W	03.07.2020	crop field	GO	2	Cicadellidae	Euscelis
1027-F4-W	1027	F4	W	03.07.2020	crop field	GO	2	Cicadellidae
1027-F4-W	1027	F4	W	03.07.2020	crop field	GO	2	Cicadellidae	Cicadella	viridis
1027-F4-W	1027	F4	W	03.07.2020	crop field	GO	2	Cicadellidae
1027-F4-W	1027	F4	W	03.07.2020	crop field	GO	2	Cicadellidae
1030-F5-M	1030	F5	M	03.07.2020	crop field	GO	2	Cicadellidae
1030-F5-M	1030	F5	M	03.07.2020	crop field	GO	2	Delphacidae	Muellerianella
1030-F5-M	1030	F5	M	03.07.2020	crop field	GO	2	Cicadellidae	Empoasca
1030-F5-M	1030	F5	M	03.07.2020	crop field	GO	2	Delphacidae
1029-F5-W	1029	F5	W	03.07.2020	crop field	GO	2	Cicadellidae	Psammotettix
1029-F5-W	1029	F5	W	03.07.2020	crop field	GO	2	Cixiidae	Cixius
1029-F5-W	1029	F5	W	03.07.2020	crop field	GO	2	Cicadellidae	Euscelis
1029-F5-W	1029	F5	W	03.07.2020	crop field	GO	2	Cicadellidae	Eupteryx	atropunctata
1029-F5-W	1029	F5	W	03.07.2020	crop field	GO	2	Cicadellidae	Empoasca
1029-F5-W	1029	F5	W	03.07.2020	crop field	GO	2	Delphacidae	Muellerianella
1029-F5-W	1029	F5	W	03.07.2020	crop field	GO	2	Cicadellidae
1032-F6-M	1032	F6	M	03.07.2020	crop field	GO	2	Cicadellidae	Macrosteles
1032-F6-M	1032	F6	M	03.07.2020	crop field	GO	2	Cicadellidae	Psammotettix
1032-F6-M	1032	F6	M	03.07.2020	crop field	GO	2	Cicadellidae
1032-F6-M	1032	F6	M	03.07.2020	crop field	GO	2	Cicadellidae	Macrosteles	sexnotatus
1032-F6-M	1032	F6	M	03.07.2020	crop field	GO	2	Cicadellidae
1032-F6-M	1032	F6	M	03.07.2020	crop field	GO	2	Cicadellidae	Empoasca
1031-F6-W	1031	F6	W	03.07.2020	crop field	GO	2	Cicadellidae	Empoasca
1031-F6-W	1031	F6	W	03.07.2020	crop field	GO	2	Cicadellidae
1031-F6-W	1031	F6	W	03.07.2020	crop field	GO	2	Cicadellidae
1031-F6-W	1031	F6	W	03.07.2020	crop field	GO	2	Cicadellidae	Empoasca
1031-F6-W	1031	F6	W	03.07.2020	crop field	GO	2	Cicadellidae	Typhlocyba	rosae
1034-F7-M	1034	F7	M	03.07.2020	crop field	GO	2	Cicadellidae	Macrosteles
1034-F7-M	1034	F7	M	03.07.2020	crop field	GO	2	Cicadellidae
1033-F7-W	1033	F7	W	03.07.2020	crop field	GO	2	Cicadellidae	Cicadella	viridis
1033-F7-W	1033	F7	W	03.07.2020	crop field	GO	2	Cicadellidae	Eupteryx	atropunctata
1033-F7-W	1033	F7	W	03.07.2020	crop field	GO	2	Cixiidae	Cixius
1033-F7-W	1033	F7	W	03.07.2020	crop field	GO	2	Cicadellidae	Eupteryx	atropunctata
1033-F7-W	1033	F7	W	03.07.2020	crop field	GO	2	Delphacidae
1033-F7-W	1033	F7	W	03.07.2020	crop field	GO	2	Cicadellidae	Empoasca
1033-F7-W	1033	F7	W	03.07.2020	crop field	GO	2	Cicadellidae
1033-F7-W	1033	F7	W	03.07.2020	crop field	GO	2	Cicadellidae	Empoasca
1036-F8-M	1036	F8	M	03.07.2020	crop field	GO	2	Cicadellidae
1036-F8-M	1036	F8	M	03.07.2020	crop field	GO	2	Cicadellidae	Empoasca
1036-F8-M	1036	F8	M	03.07.2020	crop field	GO	2	Cicadellidae	Empoasca
1036-F8-M	1036	F8	M	03.07.2020	crop field	GO	2	Cicadellidae
1035-F8-W	1035	F8	W	03.07.2020	crop field	GO	2	Cicadellidae	Athysanus	argentarius
1035-F8-W	1035	F8	W	03.07.2020	crop field	GO	2	Cicadellidae	Euscelis
1035-F8-W	1035	F8	W	03.07.2020	crop field	GO	2	Cicadellidae
1035-F8-W	1035	F8	W	03.07.2020	crop field	GO	2	Cicadellidae	Psammotettix
1035-F8-W	1035	F8	W	03.07.2020	crop field	GO	2	Cicadellidae	Empoasca
1035-F8-W	1035	F8	W	03.07.2020	crop field	GO	2	Cicadellidae	Deltocephalus	pulicaris
1035-F8-W	1035	F8	W	03.07.2020	crop field	GO	2	Cicadellidae
1035-F8-W	1035	F8	W	03.07.2020	crop field	GO	2	Cicadellidae	Euscelis
1035-F8-W	1035	F8	W	03.07.2020	crop field	GO	2	Cicadellidae	Cicadella	viridis
1035-F8-W	1035	F8	W	03.07.2020	crop field	GO	2	Cicadellidae	Athysanus
1035-F8-W	1035	F8	W	03.07.2020	crop field	GO	2	Cicadellidae
1035-F8-W	1035	F8	W	03.07.2020	crop field	GO	2	Cicadellidae
1035-F8-W	1035	F8	W	03.07.2020	crop field	GO	2	Cicadellidae
1035-F8-W	1035	F8	W	03.07.2020	crop field	GO	2	Cicadellidae	Eupteryx
1035-F8-W	1035	F8	W	03.07.2020	crop field	GO	2	Cicadellidae	Alebra
1037-F9-W	1037	F9	W	03.07.2020	crop field	GO	2	Cicadellidae	Empoasca
1040-F10-M	1040	F10	M	03.07.2020	crop field	GO	2	Cicadellidae
1040-F10-M	1040	F10	M	03.07.2020	crop field	GO	2	Cicadellidae	Empoasca
1040-F10-M	1040	F10	M	03.07.2020	crop field	GO	2	Cicadellidae
1040-F10-M	1040	F10	M	03.07.2020	crop field	GO	2	Cicadellidae	Empoasca
1039-F10-W	1039	F10	W	03.07.2020	crop field	GO	2	Cicadellidae
1039-F10-W	1039	F10	W	03.07.2020	crop field	GO	2	Cicadellidae	Empoasca
1039-F10-W	1039	F10	W	03.07.2020	crop field	GO	2	Delphacidae
1039-F10-W	1039	F10	W	03.07.2020	crop field	GO	2	Cicadellidae
962-F1-M	962	F1	M	30.06.2020	crop field	LA	2	Cicadellidae
962-F1-M	962	F1	M	30.06.2020	crop field	LA	2	Cicadellidae	Empoasca
962-F1-M	962	F1	M	30.06.2020	crop field	LA	2	Cicadellidae	Empoasca
962-F1-M	962	F1	M	30.06.2020	crop field	LA	2	Cicadellidae	Empoasca
962-F1-M	962	F1	M	30.06.2020	crop field	LA	2	Cicadellidae
962-F1-M	962	F1	M	30.06.2020	crop field	LA	2	Cicadellidae	Alebra	wahlbergi
961-F1-W	961	F1	W	30.06.2020	crop field	LA	2	Cicadellidae
961-F1-W	961	F1	W	30.06.2020	crop field	LA	2	Cicadellidae	Empoasca
961-F1-W	961	F1	W	30.06.2020	crop field	LA	2	Cicadellidae	Empoasca
961-F1-W	961	F1	W	30.06.2020	crop field	LA	2	Cicadellidae	Empoasca
961-F1-W	961	F1	W	30.06.2020	crop field	LA	2	Cicadellidae
961-F1-W	961	F1	W	30.06.2020	crop field	LA	2	Delphacidae
961-F1-W	961	F1	W	30.06.2020	crop field	LA	2	Cicadellidae
964-F2-M	964	F2	M	30.06.2020	crop field	LA	2	Cicadellidae
964-F2-M	964	F2	M	30.06.2020	crop field	LA	2	Cicadellidae	Macrosteles
964-F2-M	964	F2	M	30.06.2020	crop field	LA	2	Cicadellidae	Psammotettix
964-F2-M	964	F2	M	30.06.2020	crop field	LA	2	Cicadellidae	Typhlocyba	quercus
964-F2-M	964	F2	M	30.06.2020	crop field	LA	2	Cicadellidae
964-F2-M	964	F2	M	30.06.2020	crop field	LA	2	Cicadellidae
964-F2-M	964	F2	M	30.06.2020	crop field	LA	2	Cicadellidae	Typhlocyba	rosae
963-F2-W	963	F2	W	30.06.2020	crop field	LA	2	Cicadellidae
963-F2-W	963	F2	W	30.06.2020	crop field	LA	2	Cicadellidae	Empoasca
963-F2-W	963	F2	W	30.06.2020	crop field	LA	2	Cicadellidae	Empoasca
966-F3-M	966	F3	M	30.06.2020	crop field	LA	2	Cicadellidae
966-F3-M	966	F3	M	30.06.2020	crop field	LA	2	Cicadellidae	Psammotettix
966-F3-M	966	F3	M	30.06.2020	crop field	LA	2	Cicadellidae	Macrosteles	sexnotatus
966-F3-M	966	F3	M	30.06.2020	crop field	LA	2	Cicadellidae	Cicadella	viridis
966-F3-M	966	F3	M	30.06.2020	crop field	LA	2	Cicadellidae
966-F3-M	966	F3	M	30.06.2020	crop field	LA	2	Cicadellidae	Empoasca
965-F3-W	965	F3	W	30.06.2020	crop field	LA	2	Cicadellidae
965-F3-W	965	F3	W	30.06.2020	crop field	LA	2	Cicadellidae	Sorhoanus
965-F3-W	965	F3	W	30.06.2020	crop field	LA	2	Cicadellidae	Psammotettix
965-F3-W	965	F3	W	30.06.2020	crop field	LA	2	Cicadellidae	Cicadella	viridis
968-F4-M	968	F4	M	30.06.2020	crop field	LA	2	Cicadellidae	Psammotettix
968-F4-M	968	F4	M	30.06.2020	crop field	LA	2	Cicadellidae
968-F4-M	968	F4	M	30.06.2020	crop field	LA	2	Cicadellidae	Empoasca
968-F4-M	968	F4	M	30.06.2020	crop field	LA	2	Cicadellidae	Macrosteles
968-F4-M	968	F4	M	30.06.2020	crop field	LA	2	Cicadellidae	Ribautiana	debilis
967-F4-W	967	F4	W	30.06.2020	crop field	LA	2	Cicadellidae
967-F4-W	967	F4	W	30.06.2020	crop field	LA	2	Cicadellidae	Empoasca
967-F4-W	967	F4	W	30.06.2020	crop field	LA	2	Cicadellidae	Ribautiana	debilis
967-F4-W	967	F4	W	30.06.2020	crop field	LA	2	Cicadellidae	Cicadula
970-F5-M	970	F5	M	30.06.2020	crop field	LA	2	Cicadellidae
970-F5-M	970	F5	M	30.06.2020	crop field	LA	2	Cicadellidae	Cicadella	viridis
970-F5-M	970	F5	M	30.06.2020	crop field	LA	2	Cicadellidae	Oncopsis
970-F5-M	970	F5	M	30.06.2020	crop field	LA	2	Cicadellidae	Psammotettix
970-F5-M	970	F5	M	30.06.2020	crop field	LA	2	Cicadellidae	Empoasca
970-F5-M	970	F5	M	30.06.2020	crop field	LA	2	Delphacidae
969-F5-W	969	F5	W	30.06.2020	crop field	LA	2	Cicadellidae
969-F5-W	969	F5	W	30.06.2020	crop field	LA	2	Cicadellidae	Typhlocyba
969-F5-W	969	F5	W	30.06.2020	crop field	LA	2	Cicadellidae	Eupteryx	atropunctata
969-F5-W	969	F5	W	30.06.2020	crop field	LA	2	Cicadellidae	Empoasca
969-F5-W	969	F5	W	30.06.2020	crop field	LA	2	Cicadellidae	Empoasca
969-F5-W	969	F5	W	30.06.2020	crop field	LA	2	Cicadellidae	Empoasca
969-F5-W	969	F5	W	30.06.2020	crop field	LA	2	Cicadellidae	Ribautiana	debilis
969-F5-W	969	F5	W	30.06.2020	crop field	LA	2	Cicadellidae	Eupteryx
972-F6-M	972	F6	M	30.06.2020	crop field	LA	2	Cicadellidae
972-F6-M	972	F6	M	30.06.2020	crop field	LA	2	Cicadellidae	Psammotettix
972-F6-M	972	F6	M	30.06.2020	crop field	LA	2	Cicadellidae	Cicadella	viridis
972-F6-M	972	F6	M	30.06.2020	crop field	LA	2	Cicadellidae	Macrosteles
972-F6-M	972	F6	M	30.06.2020	crop field	LA	2	Cicadellidae	Deltocephalus	pulicaris
972-F6-M	972	F6	M	30.06.2020	crop field	LA	2	Cicadellidae	Empoasca
972-F6-M	972	F6	M	30.06.2020	crop field	LA	2	Cicadellidae
971-F6-W	971	F6	W	30.06.2020	crop field	LA	2	Cicadellidae
971-F6-W	971	F6	W	30.06.2020	crop field	LA	2	Cicadellidae	Empoasca
971-F6-W	971	F6	W	30.06.2020	crop field	LA	2	Cicadellidae	Cicadella	viridis
971-F6-W	971	F6	W	30.06.2020	crop field	LA	2	Cicadellidae
971-F6-W	971	F6	W	30.06.2020	crop field	LA	2	Cicadellidae	Empoasca
971-F6-W	971	F6	W	30.06.2020	crop field	LA	2	Cicadellidae	Typhlocyba	quercus
971-F6-W	971	F6	W	30.06.2020	crop field	LA	2	Cicadellidae	Ribautiana	debilis
971-F6-W	971	F6	W	30.06.2020	crop field	LA	2	Cicadellidae	Typhlocyba
971-F6-W	971	F6	W	30.06.2020	crop field	LA	2	Cicadellidae	Empoasca
974-F7-M	974	F7	M	30.06.2020	crop field	LA	2	Cicadellidae
974-F7-M	974	F7	M	30.06.2020	crop field	LA	2	Cicadellidae	Psammotettix
974-F7-M	974	F7	M	30.06.2020	crop field	LA	2	Cicadellidae	Macrosteles
974-F7-M	974	F7	M	30.06.2020	crop field	LA	2	Cicadellidae	Empoasca
974-F7-M	974	F7	M	30.06.2020	crop field	LA	2	Cicadellidae	Alebra	wahlbergi
974-F7-M	974	F7	M	30.06.2020	crop field	LA	2	Cicadellidae	Empoasca
974-F7-M	974	F7	M	30.06.2020	crop field	LA	2	Cicadellidae
976-F8-M	976	F8	M	30.06.2020	crop field	LA	2	Cicadellidae	Psammotettix
976-F8-M	976	F8	M	30.06.2020	crop field	LA	2	Cicadellidae	Empoasca
976-F8-M	976	F8	M	30.06.2020	crop field	LA	2	Cicadellidae
976-F8-M	976	F8	M	30.06.2020	crop field	LA	2	Cicadellidae	Empoasca
976-F8-M	976	F8	M	30.06.2020	crop field	LA	2	Delphacidae
975-F8-W	975	F8	W	30.06.2020	crop field	LA	2	Cicadellidae	Eupteryx	atropunctata
975-F8-W	975	F8	W	30.06.2020	crop field	LA	2	Cicadellidae	Empoasca
975-F8-W	975	F8	W	30.06.2020	crop field	LA	2	Cicadellidae	Idiocerus
975-F8-W	975	F8	W	30.06.2020	crop field	LA	2	Cicadellidae	Eupteryx	atropunctata
975-F8-W	975	F8	W	30.06.2020	crop field	LA	2	Cicadellidae
978-F9-M	978	F9	M	30.06.2020	crop field	LA	2	Cicadellidae
978-F9-M	978	F9	M	30.06.2020	crop field	LA	2	Cicadellidae	Macrosteles
978-F9-M	978	F9	M	30.06.2020	crop field	LA	2	Cicadellidae	Empoasca
978-F9-M	978	F9	M	30.06.2020	crop field	LA	2	Cicadellidae
978-F9-M	978	F9	M	30.06.2020	crop field	LA	2	Cicadellidae	Ribautiana	debilis
977-F9-W	977	F9	W	30.06.2020	crop field	LA	2	Cicadellidae
977-F9-W	977	F9	W	30.06.2020	crop field	LA	2	Cicadellidae	Empoasca
977-F9-W	977	F9	W	30.06.2020	crop field	LA	2	Cicadellidae	Cicadella	viridis
977-F9-W	977	F9	W	30.06.2020	crop field	LA	2	Cicadellidae
977-F9-W	977	F9	W	30.06.2020	crop field	LA	2	Cicadellidae	Macropsis	notata
980-F10-M	980	F10	M	30.06.2020	crop field	LA	2	Cicadellidae
980-F10-M	980	F10	M	30.06.2020	crop field	LA	2	Cicadellidae	Psammotettix
980-F10-M	980	F10	M	30.06.2020	crop field	LA	2	Cicadellidae	Empoasca
980-F10-M	980	F10	M	30.06.2020	crop field	LA	2	Cicadellidae
980-F10-M	980	F10	M	30.06.2020	crop field	LA	2	Cicadellidae	Psammotettix
979-F10-W	979	F10	W	30.06.2020	crop field	LA	2	Cicadellidae
979-F10-W	979	F10	W	30.06.2020	crop field	LA	2	Aphrophoridae	Aphrophora	alni
979-F10-W	979	F10	W	30.06.2020	crop field	LA	2	Cicadellidae	Psammotettix
979-F10-W	979	F10	W	30.06.2020	crop field	LA	2	Cicadellidae
979-F10-W	979	F10	W	30.06.2020	crop field	LA	2	Cicadellidae
979-F10-W	979	F10	W	30.06.2020	crop field	LA	2	Cicadellidae	Empoasca
979-F10-W	979	F10	W	30.06.2020	crop field	LA	2	Cicadellidae	Fagocyba	douglasi
979-F10-W	979	F10	W	30.06.2020	crop field	LA	2	Cicadellidae
979-F10-W	979	F10	W	30.06.2020	crop field	LA	2	Aphrophoridae
979-F10-W	979	F10	W	30.06.2020	crop field	LA	2	Cicadellidae	Typhlocyba	quercus
979-F10-W	979	F10	W	30.06.2020	crop field	LA	2	Cicadellidae	Ribautiana	debilis
979-F10-W	979	F10	W	30.06.2020	crop field	LA	2	Cicadellidae	Cicadula
847-55-M	847	55	M	11.09.2020	grassland	CH	3	Cicadellidae	Macrosteles	sexnotatus
847-55-M	847	55	M	11.09.2020	grassland	CH	3	Cicadellidae
847-55-M	847	55	M	11.09.2020	grassland	CH	3	Cicadellidae	Empoasca	luda
847-55-M	847	55	M	11.09.2020	grassland	CH	3	Cicadellidae	Typhlocyba
847-55-M	847	55	M	11.09.2020	grassland	CH	3	Cicadellidae	Cicadella	viridis
847-55-M	847	55	M	11.09.2020	grassland	CH	3	Cicadellidae	Typhlocyba
847-55-M	847	55	M	11.09.2020	grassland	CH	3	Delphacidae	Laodelphax
847-55-M	847	55	M	11.09.2020	grassland	CH	3	Aphrophoridae	Philaenus	spumarius
847-55-M	847	55	M	11.09.2020	grassland	CH	3	Delphacidae	Dicranotropis	hamata
848-56-M	848	56	M	11.09.2020	grassland	CH	3	Cicadellidae	Cicadella	viridis
848-56-M	848	56	M	11.09.2020	grassland	CH	3	Cicadellidae
848-56-M	848	56	M	11.09.2020	grassland	CH	3	Cicadellidae	Macrosteles	sexnotatus
848-56-M	848	56	M	11.09.2020	grassland	CH	3	Cicadellidae
848-56-M	848	56	M	11.09.2020	grassland	CH	3	Cicadellidae	Empoasca	luda
848-56-M	848	56	M	11.09.2020	grassland	CH	3	Delphacidae	Laodelphax
849-57-M	849	57	M	11.09.2020	grassland	CH	3	Cicadellidae	Empoasca	luda
849-57-M	849	57	M	11.09.2020	grassland	CH	3	Cicadellidae
849-57-M	849	57	M	11.09.2020	grassland	CH	3	Cicadellidae
850-58-M	850	58	M	11.09.2020	grassland	CH	3	Cicadellidae	Cicadella	viridis
850-58-M	850	58	M	11.09.2020	grassland	CH	3	Cicadellidae	Macrosteles	sexnotatus
850-58-M	850	58	M	11.09.2020	grassland	CH	3	Cicadellidae
850-58-M	850	58	M	11.09.2020	grassland	CH	3	Cicadellidae	Orientus	ishidae
850-58-M	850	58	M	11.09.2020	grassland	CH	3	Delphacidae	Laodelphax
850-58-M	850	58	M	11.09.2020	grassland	CH	3	Cicadellidae	Empoasca	luda
850-58-M	850	58	M	11.09.2020	grassland	CH	3	Cicadellidae	Eupteryx
851-59-M	851	59	M	11.09.2020	grassland	CH	3	Delphacidae
851-59-M	851	59	M	11.09.2020	grassland	CH	3	Cicadellidae	Macrosteles	sexnotatus
851-59-M	851	59	M	11.09.2020	grassland	CH	3	Delphacidae	Muellerianella
851-59-M	851	59	M	11.09.2020	grassland	CH	3	Cicadellidae	Cicadella	viridis
851-59-M	851	59	M	11.09.2020	grassland	CH	3	Delphacidae	Laodelphax
851-59-M	851	59	M	11.09.2020	grassland	CH	3	Cicadellidae
851-59-M	851	59	M	11.09.2020	grassland	CH	3	Cicadellidae	Macrosteles
851-59-M	851	59	M	11.09.2020	grassland	CH	3	Cicadellidae	Typhlocyba	ulmiphagus
852-60-M	852	60	M	11.09.2020	grassland	CH	3	Cicadellidae	Cicadella	viridis
852-60-M	852	60	M	11.09.2020	grassland	CH	3	Aphrophoridae	Aphrophora	alni
852-60-M	852	60	M	11.09.2020	grassland	CH	3	Cicadellidae	Typhlocyba	rosae
852-60-M	852	60	M	11.09.2020	grassland	CH	3	Cicadellidae	Macrosteles	sexnotatus
852-60-M	852	60	M	11.09.2020	grassland	CH	3	Aphrophoridae	Aphrophora
853-61-M	853	61	M	11.09.2020	grassland	CH	3	Cicadellidae	Macrosteles	sexnotatus
853-61-M	853	61	M	11.09.2020	grassland	CH	3	Cicadellidae	Empoasca	luda
853-61-M	853	61	M	11.09.2020	grassland	CH	3	Cicadellidae
855-63-M	855	63	M	11.09.2020	grassland	CH	3	Cicadellidae	Macrosteles	sexnotatus
855-63-M	855	63	M	11.09.2020	grassland	CH	3	Delphacidae
855-63-M	855	63	M	11.09.2020	grassland	CH	3	Cicadellidae	Orientus	ishidae
855-63-M	855	63	M	11.09.2020	grassland	CH	3	Cicadellidae	Psammotettix
855-63-M	855	63	M	11.09.2020	grassland	CH	3	Cicadellidae	Cicadula
855-63-M	855	63	M	11.09.2020	grassland	CH	3	Cicadellidae
855-63-M	855	63	M	11.09.2020	grassland	CH	3	Cicadellidae	Macrosteles
855-63-M	855	63	M	11.09.2020	grassland	CH	3	Cicadellidae
855-63-M	855	63	M	11.09.2020	grassland	CH	3	Cicadellidae	Typhlocyba
855-63-M	855	63	M	11.09.2020	grassland	CH	3	Delphacidae
855-63-M	855	63	M	11.09.2020	grassland	CH	3	Cicadellidae	Cicadula
855-63-M	855	63	M	11.09.2020	grassland	CH	3	Cicadellidae	Macrosteles
856-64-M	856	64	M	11.09.2020	grassland	CH	3	Cicadellidae	Cicadella	viridis
856-64-M	856	64	M	11.09.2020	grassland	CH	3	Cicadellidae	Macrosteles	sexnotatus
856-64-M	856	64	M	11.09.2020	grassland	CH	3	Delphacidae
856-64-M	856	64	M	11.09.2020	grassland	CH	3	Cicadellidae	Macrosteles
856-64-M	856	64	M	11.09.2020	grassland	CH	3	Cicadellidae
856-64-M	856	64	M	11.09.2020	grassland	CH	3	Cicadellidae	Macrosteles
856-64-M	856	64	M	11.09.2020	grassland	CH	3	Cicadellidae	Empoasca	luda
856-64-M	856	64	M	11.09.2020	grassland	CH	3	Cicadellidae	Empoasca	decipiens
856-64-M	856	64	M	11.09.2020	grassland	CH	3	Delphacidae	Muellerianella
856-64-M	856	64	M	11.09.2020	grassland	CH	3	Cicadellidae
857-65-M	857	65	M	11.09.2020	grassland	CH	3	Cicadellidae	Cicadella	viridis
857-65-M	857	65	M	11.09.2020	grassland	CH	3	Cicadellidae
857-65-M	857	65	M	11.09.2020	grassland	CH	3	Cicadellidae
858-66-M	858	66	M	11.09.2020	grassland	CH	3	Delphacidae
858-66-M	858	66	M	11.09.2020	grassland	CH	3	Cicadellidae	Macrosteles	sexnotatus
858-66-M	858	66	M	11.09.2020	grassland	CH	3	Cicadellidae	Macrosteles
858-66-M	858	66	M	11.09.2020	grassland	CH	3	Cicadellidae	Eupteryx	atropunctata
858-66-M	858	66	M	11.09.2020	grassland	CH	3	Delphacidae
859-67-M	859	67	M	11.09.2020	grassland	CH	3	Cicadellidae	Cicadella	viridis
859-67-M	859	67	M	11.09.2020	grassland	CH	3	Cicadellidae	Macrosteles
859-67-M	859	67	M	11.09.2020	grassland	CH	3	Cicadellidae	Empoasca	luda
859-67-M	859	67	M	11.09.2020	grassland	CH	3	Delphacidae
859-67-M	859	67	M	11.09.2020	grassland	CH	3	Cicadellidae	Macrosteles
859-67-M	859	67	M	11.09.2020	grassland	CH	3	Cicadellidae	Cicadella
859-67-M	859	67	M	11.09.2020	grassland	CH	3	Cicadellidae	Empoasca	luda
859-67-M	859	67	M	11.09.2020	grassland	CH	3	Delphacidae	Laodelphax
860-68-M	860	68	M	11.09.2020	grassland	CH	3	Delphacidae
860-68-M	860	68	M	11.09.2020	grassland	CH	3	Cicadellidae	Conosanus	obsoletus
860-68-M	860	68	M	11.09.2020	grassland	CH	3	Cicadellidae	Deltocephalus	pulicaris
860-68-M	860	68	M	11.09.2020	grassland	CH	3	Cicadellidae	Macrosteles
860-68-M	860	68	M	11.09.2020	grassland	CH	3	Delphacidae
861-69-M	861	69	M	11.09.2020	grassland	CH	3	Delphacidae
861-69-M	861	69	M	11.09.2020	grassland	CH	3	Aphrophoridae	Aphrophora	alni
861-69-M	861	69	M	11.09.2020	grassland	CH	3	Cicadellidae	Macrosteles
861-69-M	861	69	M	11.09.2020	grassland	CH	3	Cicadellidae	Macrosteles	sexnotatus
861-69-M	861	69	M	11.09.2020	grassland	CH	3	Cicadellidae	Typhlocyba
861-69-M	861	69	M	11.09.2020	grassland	CH	3	Cicadellidae	Macrosteles
861-69-M	861	69	M	11.09.2020	grassland	CH	3	Cicadellidae
862-70-M	862	70	M	11.09.2020	grassland	CH	3	Cicadellidae	Macrosteles
862-70-M	862	70	M	11.09.2020	grassland	CH	3	Cicadellidae	Cicadella	viridis
862-70-M	862	70	M	11.09.2020	grassland	CH	3	Cicadellidae	Macrosteles	sexnotatus
862-70-M	862	70	M	11.09.2020	grassland	CH	3	Cicadellidae	Empoasca	luda
862-70-M	862	70	M	11.09.2020	grassland	CH	3	Delphacidae
863-71-M	863	71	M	11.09.2020	grassland	CH	3	Aphrophoridae	Aphrophora	alni
863-71-M	863	71	M	11.09.2020	grassland	CH	3	Cicadellidae	Cicadella	viridis
863-71-M	863	71	M	11.09.2020	grassland	CH	3	Cicadellidae	Macrosteles
863-71-M	863	71	M	11.09.2020	grassland	CH	3	Aphrophoridae	Aphrophora
863-71-M	863	71	M	11.09.2020	grassland	CH	3	Cixiidae	Cixius
863-71-M	863	71	M	11.09.2020	grassland	CH	3	Cicadellidae
863-71-M	863	71	M	11.09.2020	grassland	CH	3	Cicadellidae
863-71-M	863	71	M	11.09.2020	grassland	CH	3	Aphrophoridae	Aphrophora
863-71-M	863	71	M	11.09.2020	grassland	CH	3	Aphrophoridae	Aphrophora
863-71-M	863	71	M	11.09.2020	grassland	CH	3	Aphrophoridae	Aphrophora
863-71-M	863	71	M	11.09.2020	grassland	CH	3	Cicadellidae	Cicadella
864-72-M	864	72	M	11.09.2020	grassland	CH	3	Cicadellidae	Macrosteles	sexnotatus
864-72-M	864	72	M	11.09.2020	grassland	CH	3	Cicadellidae	Macrosteles
864-72-M	864	72	M	11.09.2020	grassland	CH	3	Cicadellidae	Typhlocyba
864-72-M	864	72	M	11.09.2020	grassland	CH	3	Cicadellidae	Macrosteles
864-72-M	864	72	M	11.09.2020	grassland	CH	3	Cicadellidae	Fagocyba	douglasi
721-37-M	721	37	M	02.09.2020	grassland	VOW	3	Cicadellidae	Empoasca	luda
721-37-M	721	37	M	02.09.2020	grassland	VOW	3	Cicadellidae	Empoasca	luda
721-37-M	721	37	M	02.09.2020	grassland	VOW	3	Cicadellidae	Macrosteles
721-37-M	721	37	M	02.09.2020	grassland	VOW	3	Cicadellidae	Empoasca	decipiens
721-37-M	721	37	M	02.09.2020	grassland	VOW	3	Cicadellidae
721-37-M	721	37	M	02.09.2020	grassland	VOW	3	Cicadellidae	Eupteryx	atropunctata
721-37-M	721	37	M	02.09.2020	grassland	VOW	3	Cicadellidae	Eupteryx	atropunctata
721-37-M	721	37	M	02.09.2020	grassland	VOW	3	Cicadellidae	Tremulicerus
724-38-M	724	38	M	02.09.2020	grassland	VOW	3	Cicadellidae	Idiocerus
724-38-M	724	38	M	02.09.2020	grassland	VOW	3	Cicadellidae	Empoasca
724-38-M	724	38	M	02.09.2020	grassland	VOW	3	Cicadellidae	Empoasca
727-39-M	727	39	M	02.09.2020	grassland	VOW	3	Cicadellidae	Empoasca	luda
727-39-M	727	39	M	02.09.2020	grassland	VOW	3	Cicadellidae	Empoasca	luda
730-40-M	730	40	M	02.09.2020	grassland	VOW	3	Cicadellidae
730-40-M	730	40	M	02.09.2020	grassland	VOW	3	Cicadellidae
730-40-M	730	40	M	02.09.2020	grassland	VOW	3	Cicadellidae	Empoasca	luda
730-40-M	730	40	M	02.09.2020	grassland	VOW	3	Cicadellidae
730-40-M	730	40	M	02.09.2020	grassland	VOW	3	Cicadellidae	Empoasca	luda
730-40-M	730	40	M	02.09.2020	grassland	VOW	3	Cicadellidae	Macrosteles	sexnotatus
730-40-M	730	40	M	02.09.2020	grassland	VOW	3	Cicadellidae
730-40-M	730	40	M	02.09.2020	grassland	VOW	3	Cicadellidae	Typhlocyba	rosae
730-40-M	730	40	M	02.09.2020	grassland	VOW	3	Cicadellidae
733-41-M	733	41	M	02.09.2020	grassland	VOW	3	Cicadellidae	Grypotes	puncticollis
733-41-M	733	41	M	02.09.2020	grassland	VOW	3	Cicadellidae
733-41-M	733	41	M	02.09.2020	grassland	VOW	3	Cicadellidae	Deltocephalus	pulicaris
733-41-M	733	41	M	02.09.2020	grassland	VOW	3	Cixiidae	Cixius
736-42-M	736	42	M	02.09.2020	grassland	VOW	3	Cicadellidae	Empoasca	luda
736-42-M	736	42	M	02.09.2020	grassland	VOW	3	Cixiidae	Cixius
736-42-M	736	42	M	02.09.2020	grassland	VOW	3	Cicadellidae	Typhlocyba	rosae
736-42-M	736	42	M	02.09.2020	grassland	VOW	3	Cicadellidae
739-43-M	739	43	M	02.09.2020	grassland	VOW	3	Cicadellidae	Empoasca	luda
739-43-M	739	43	M	02.09.2020	grassland	VOW	3	Cicadellidae	Idiocerus
739-43-M	739	43	M	02.09.2020	grassland	VOW	3	Cicadellidae	Eupteryx	atropunctata
739-43-M	739	43	M	02.09.2020	grassland	VOW	3	Cicadellidae	Empoasca	luda
739-43-M	739	43	M	02.09.2020	grassland	VOW	3	Cicadellidae
739-43-M	739	43	M	02.09.2020	grassland	VOW	3	Cicadellidae
739-43-M	739	43	M	02.09.2020	grassland	VOW	3	Cicadellidae	Typhlocyba
742-44-M	742	44	M	02.09.2020	grassland	VOW	3	Cicadellidae	Eupteryx	atropunctata
742-44-M	742	44	M	02.09.2020	grassland	VOW	3	Cicadellidae
742-44-M	742	44	M	02.09.2020	grassland	VOW	3	Cicadellidae	Eupteryx	atropunctata
742-44-M	742	44	M	02.09.2020	grassland	VOW	3	Cicadellidae	Empoasca	luda
742-44-M	742	44	M	02.09.2020	grassland	VOW	3	Cicadellidae
742-44-M	742	44	M	02.09.2020	grassland	VOW	3	Cicadellidae	Eupteryx
742-44-M	742	44	M	02.09.2020	grassland	VOW	3	Cicadellidae
742-44-M	742	44	M	02.09.2020	grassland	VOW	3	Cicadellidae
745-45-M	745	45	M	02.09.2020	grassland	VOW	3	Aphrophoridae	Aphrophora	alni
745-45-M	745	45	M	02.09.2020	grassland	VOW	3	Cicadellidae	Empoasca	luda
745-45-M	745	45	M	02.09.2020	grassland	VOW	3	Cicadellidae
745-45-M	745	45	M	02.09.2020	grassland	VOW	3	Cicadellidae	Fagocyba	douglasi
748-46-M	748	46	M	02.09.2020	grassland	VOW	3	Cicadellidae
748-46-M	748	46	M	02.09.2020	grassland	VOW	3	Cicadellidae	Zygina	ordinaria
751-47-M	751	47	M	02.09.2020	grassland	VOW	3	Cicadellidae	Idiocerus
751-47-M	751	47	M	02.09.2020	grassland	VOW	3	Cicadellidae	Empoasca	luda
751-47-M	751	47	M	02.09.2020	grassland	VOW	3	Cicadellidae
751-47-M	751	47	M	02.09.2020	grassland	VOW	3	Cicadellidae	Macropsis	notata
751-47-M	751	47	M	02.09.2020	grassland	VOW	3	Cicadellidae	Empoasca	luda
751-47-M	751	47	M	02.09.2020	grassland	VOW	3	Cicadellidae	Idiocerus	stigmaticalis
751-47-M	751	47	M	02.09.2020	grassland	VOW	3	Cicadellidae	Idiocerus
754-48-M	754	48	M	02.09.2020	grassland	VOW	3	Cicadellidae	Empoasca	luda
754-48-M	754	48	M	02.09.2020	grassland	VOW	3	Cicadellidae
754-48-M	754	48	M	02.09.2020	grassland	VOW	3	Cicadellidae	Cicadella	viridis
754-48-M	754	48	M	02.09.2020	grassland	VOW	3	Delphacidae	Muellerianella
754-48-M	754	48	M	02.09.2020	grassland	VOW	3	Cicadellidae	Idiocerus
757-49-M	757	49	M	02.09.2020	grassland	VOW	3	Cicadellidae
760-50-M	760	50	M	02.09.2020	grassland	VOW	3	Cicadellidae
760-50-M	760	50	M	02.09.2020	grassland	VOW	3	Cicadellidae	Empoasca	luda
760-50-M	760	50	M	02.09.2020	grassland	VOW	3	Cixiidae
760-50-M	760	50	M	02.09.2020	grassland	VOW	3	Cicadellidae	Fagocyba	douglasi
763-51-M	763	51	M	02.09.2020	grassland	VOW	3	Cicadellidae	Empoasca	luda
763-51-M	763	51	M	02.09.2020	grassland	VOW	3	Membracidae
763-51-M	763	51	M	02.09.2020	grassland	VOW	3	Cicadellidae	Empoasca	luda
766-52-M	766	52	M	02.09.2020	grassland	VOW	3	Cicadellidae
766-52-M	766	52	M	02.09.2020	grassland	VOW	3	Cicadellidae	Eupteryx	atropunctata
766-52-M	766	52	M	02.09.2020	grassland	VOW	3	Delphacidae
766-52-M	766	52	M	02.09.2020	grassland	VOW	3	Cicadellidae	Alebra	wahlbergi
766-52-M	766	52	M	02.09.2020	grassland	VOW	3	Cicadellidae	Fagocyba	douglasi
769-53-M	769	53	M	02.09.2020	grassland	VOW	3	Cicadellidae	Eupteryx	atropunctata
769-53-M	769	53	M	02.09.2020	grassland	VOW	3	Cicadellidae
769-53-M	769	53	M	02.09.2020	grassland	VOW	3	Cicadellidae	Alebra
769-53-M	769	53	M	02.09.2020	grassland	VOW	3	Cicadellidae
769-53-M	769	53	M	02.09.2020	grassland	VOW	3	Cicadellidae	Typhlocyba	rosae
772-54-M	772	54	M	02.09.2020	grassland	VOW	3	Aphrophoridae	Aphrophora	alni
772-54-M	772	54	M	02.09.2020	grassland	VOW	3	Cicadellidae
772-54-M	772	54	M	02.09.2020	grassland	VOW	3	Cicadellidae	Idiocerus
772-54-M	772	54	M	02.09.2020	grassland	VOW	3	Cicadellidae	Idiocerus	stigmaticalis
772-54-M	772	54	M	02.09.2020	grassland	VOW	3	Cicadellidae
772-54-M	772	54	M	02.09.2020	grassland	VOW	3	Cicadellidae	Empoasca	luda
772-54-M	772	54	M	02.09.2020	grassland	VOW	3	Cicadellidae	Eupteryx	atropunctata
772-54-M	772	54	M	02.09.2020	grassland	VOW	3	Aphrophoridae	Aphrophora
772-54-M	772	54	M	02.09.2020	grassland	VOW	3	Cicadellidae	Empoasca	luda
1382-F1-M	1382	F1	M	08.09.2020	crop field	GO	3	Cicadellidae
1382-F1-M	1382	F1	M	08.09.2020	crop field	GO	3	Cicadellidae	Macrosteles
1382-F1-M	1382	F1	M	08.09.2020	crop field	GO	3	Cicadellidae
1382-F1-M	1382	F1	M	08.09.2020	crop field	GO	3	Cicadellidae	Eupteryx	atropunctata
1382-F1-M	1382	F1	M	08.09.2020	crop field	GO	3	Cicadellidae	Empoasca
1382-F1-M	1382	F1	M	08.09.2020	crop field	GO	3	Cicadellidae
1381-F1-W	1381	F1	W	08.09.2020	crop field	GO	3	Cicadellidae	Eupteryx	atropunctata
1381-F1-W	1381	F1	W	08.09.2020	crop field	GO	3	Cicadellidae	Orientus	ishidae
1381-F1-W	1381	F1	W	08.09.2020	crop field	GO	3	Cicadellidae
1381-F1-W	1381	F1	W	08.09.2020	crop field	GO	3	Cicadellidae	Cicadella	viridis
1381-F1-W	1381	F1	W	08.09.2020	crop field	GO	3	Cicadellidae
1384-F2-M	1384	F2	M	08.09.2020	crop field	GO	3	Cicadellidae
1384-F2-M	1384	F2	M	08.09.2020	crop field	GO	3	Cicadellidae	Macrosteles
1384-F2-M	1384	F2	M	08.09.2020	crop field	GO	3	Cicadellidae	Cicadella	viridis
1384-F2-M	1384	F2	M	08.09.2020	crop field	GO	3	Cicadellidae	Psammotettix
1384-F2-M	1384	F2	M	08.09.2020	crop field	GO	3	Cicadellidae	Eupteryx	atropunctata
1384-F2-M	1384	F2	M	08.09.2020	crop field	GO	3	Cicadellidae	Empoasca
1384-F2-M	1384	F2	M	08.09.2020	crop field	GO	3	Delphacidae
1384-F2-M	1384	F2	M	08.09.2020	crop field	GO	3	Cixiidae	Cixius
1384-F2-M	1384	F2	M	08.09.2020	crop field	GO	3	Cicadellidae	Forcipata
1384-F2-M	1384	F2	M	08.09.2020	crop field	GO	3	Cicadellidae
1383-F2-W	1383	F2	W	08.09.2020	crop field	GO	3	Cicadellidae	Eupteryx	atropunctata
1383-F2-W	1383	F2	W	08.09.2020	crop field	GO	3	Cicadellidae
1383-F2-W	1383	F2	W	08.09.2020	crop field	GO	3	Delphacidae	Laodelphax
1383-F2-W	1383	F2	W	08.09.2020	crop field	GO	3	Cicadellidae	Cicadella	viridis
1383-F2-W	1383	F2	W	08.09.2020	crop field	GO	3	Cicadellidae
1383-F2-W	1383	F2	W	08.09.2020	crop field	GO	3	Cicadellidae
1383-F2-W	1383	F2	W	08.09.2020	crop field	GO	3	Cicadellidae
1386-F3-M	1386	F3	M	08.09.2020	crop field	GO	3	Cicadellidae
1386-F3-M	1386	F3	M	08.09.2020	crop field	GO	3	Cicadellidae	Cicadella	viridis
1386-F3-M	1386	F3	M	08.09.2020	crop field	GO	3	Cicadellidae	Macrosteles
1386-F3-M	1386	F3	M	08.09.2020	crop field	GO	3	Cicadellidae	Psammotettix
1386-F3-M	1386	F3	M	08.09.2020	crop field	GO	3	Delphacidae	Laodelphax
1386-F3-M	1386	F3	M	08.09.2020	crop field	GO	3	Cicadellidae	Typhlocyba
1386-F3-M	1386	F3	M	08.09.2020	crop field	GO	3	Cicadellidae
1386-F3-M	1386	F3	M	08.09.2020	crop field	GO	3	Cicadellidae
1386-F3-M	1386	F3	M	08.09.2020	crop field	GO	3	Cicadellidae	Macrosteles
1385-F3-W	1385	F3	W	08.09.2020	crop field	GO	3	Cicadellidae	Cicadella	viridis
1385-F3-W	1385	F3	W	08.09.2020	crop field	GO	3	Cicadellidae	Psammotettix
1385-F3-W	1385	F3	W	08.09.2020	crop field	GO	3	Cicadellidae
1385-F3-W	1385	F3	W	08.09.2020	crop field	GO	3	Cicadellidae	Macrosteles
1385-F3-W	1385	F3	W	08.09.2020	crop field	GO	3	Cicadellidae	Typhlocyba	rosae
1385-F3-W	1385	F3	W	08.09.2020	crop field	GO	3	Delphacidae	Laodelphax
1385-F3-W	1385	F3	W	08.09.2020	crop field	GO	3	Cicadellidae	Eupteryx	atropunctata
1385-F3-W	1385	F3	W	08.09.2020	crop field	GO	3	Cicadellidae
1388-F4-M	1388	F4	M	08.09.2020	crop field	GO	3	Cicadellidae
1388-F4-M	1388	F4	M	08.09.2020	crop field	GO	3	Cicadellidae	Psammotettix
1388-F4-M	1388	F4	M	08.09.2020	crop field	GO	3	Cicadellidae	Cicadella	viridis
1388-F4-M	1388	F4	M	08.09.2020	crop field	GO	3	Cicadellidae	Macrosteles	sexnotatus
1388-F4-M	1388	F4	M	08.09.2020	crop field	GO	3	Cicadellidae	Macrosteles
1388-F4-M	1388	F4	M	08.09.2020	crop field	GO	3	Cicadellidae
1387-F4-W	1387	F4	W	08.09.2020	crop field	GO	3	Cicadellidae	Cicadella	viridis
1387-F4-W	1387	F4	W	08.09.2020	crop field	GO	3	Cicadellidae
1387-F4-W	1387	F4	W	08.09.2020	crop field	GO	3	Cicadellidae	Macrosteles
1387-F4-W	1387	F4	W	08.09.2020	crop field	GO	3	Cicadellidae	Eupteryx	decemnotata
1387-F4-W	1387	F4	W	08.09.2020	crop field	GO	3	Cicadellidae
1387-F4-W	1387	F4	W	08.09.2020	crop field	GO	3	Cicadellidae	Orientus	ishidae
1387-F4-W	1387	F4	W	08.09.2020	crop field	GO	3	Cicadellidae	Eupteryx	atropunctata
1387-F4-W	1387	F4	W	08.09.2020	crop field	GO	3	Delphacidae	Laodelphax
1387-F4-W	1387	F4	W	08.09.2020	crop field	GO	3	Cicadellidae
1387-F4-W	1387	F4	W	08.09.2020	crop field	GO	3	Cicadellidae	Cicadella
1387-F4-W	1387	F4	W	08.09.2020	crop field	GO	3	Cicadellidae	Macrosteles
1390-F5-M	1390	F5	M	08.09.2020	crop field	GO	3	Cicadellidae
1390-F5-M	1390	F5	M	08.09.2020	crop field	GO	3	Cicadellidae	Eupteryx	atropunctata
1390-F5-M	1390	F5	M	08.09.2020	crop field	GO	3	Cicadellidae	Macrosteles
1390-F5-M	1390	F5	M	08.09.2020	crop field	GO	3	Cicadellidae	Empoasca
1390-F5-M	1390	F5	M	08.09.2020	crop field	GO	3	Delphacidae	Laodelphax
1390-F5-M	1390	F5	M	08.09.2020	crop field	GO	3	Cicadellidae	Macrosteles	sexnotatus
1390-F5-M	1390	F5	M	08.09.2020	crop field	GO	3	Cicadellidae
1390-F5-M	1390	F5	M	08.09.2020	crop field	GO	3	Cicadellidae	Typhlocyba	rosae
1389-F5-W	1389	F5	W	08.09.2020	crop field	GO	3	Cicadellidae
1389-F5-W	1389	F5	W	08.09.2020	crop field	GO	3	Cicadellidae	Eupteryx	atropunctata
1389-F5-W	1389	F5	W	08.09.2020	crop field	GO	3	Cicadellidae	Eupteryx	atropunctata
1392-F6-M	1392	F6	M	08.09.2020	crop field	GO	3	Cicadellidae	Eupteryx	atropunctata
1392-F6-M	1392	F6	M	08.09.2020	crop field	GO	3	Cicadellidae
1392-F6-M	1392	F6	M	08.09.2020	crop field	GO	3	Delphacidae	Laodelphax
1392-F6-M	1392	F6	M	08.09.2020	crop field	GO	3	Cicadellidae	Psammotettix
1392-F6-M	1392	F6	M	08.09.2020	crop field	GO	3	Cicadellidae	Macrosteles
1392-F6-M	1392	F6	M	08.09.2020	crop field	GO	3	Cicadellidae
1392-F6-M	1392	F6	M	08.09.2020	crop field	GO	3	Cicadellidae	Eupteryx	atropunctata
1391-F6-W	1391	F6	W	08.09.2020	crop field	GO	3	Cicadellidae	Eupteryx	atropunctata
1391-F6-W	1391	F6	W	08.09.2020	crop field	GO	3	Delphacidae	Dicranotropis	hamata
1391-F6-W	1391	F6	W	08.09.2020	crop field	GO	3	Cicadellidae
1391-F6-W	1391	F6	W	08.09.2020	crop field	GO	3	Cicadellidae	Cicadella	viridis
1391-F6-W	1391	F6	W	08.09.2020	crop field	GO	3	Cicadellidae	Psammotettix
1391-F6-W	1391	F6	W	08.09.2020	crop field	GO	3	Delphacidae	Laodelphax
1391-F6-W	1391	F6	W	08.09.2020	crop field	GO	3	Cicadellidae	Eupteryx	atropunctata
1391-F6-W	1391	F6	W	08.09.2020	crop field	GO	3	Cicadellidae	Macrosteles
1391-F6-W	1391	F6	W	08.09.2020	crop field	GO	3	Delphacidae
1391-F6-W	1391	F6	W	08.09.2020	crop field	GO	3	Cicadellidae	Ribautiana	debilis
1391-F6-W	1391	F6	W	08.09.2020	crop field	GO	3	Delphacidae	Dicranotropis	hamata
1391-F6-W	1391	F6	W	08.09.2020	crop field	GO	3	Delphacidae
1391-F6-W	1391	F6	W	08.09.2020	crop field	GO	3	Cicadellidae
1391-F6-W	1391	F6	W	08.09.2020	crop field	GO	3	Delphacidae
1394-F7-M	1394	F7	M	08.09.2020	crop field	GO	3	Cicadellidae
1394-F7-M	1394	F7	M	08.09.2020	crop field	GO	3	Cicadellidae	Psammotettix
1394-F7-M	1394	F7	M	08.09.2020	crop field	GO	3	Cicadellidae	Eupteryx	atropunctata
1394-F7-M	1394	F7	M	08.09.2020	crop field	GO	3	Cicadellidae	Macrosteles
1394-F7-M	1394	F7	M	08.09.2020	crop field	GO	3	Cicadellidae	Cicadella	viridis
1394-F7-M	1394	F7	M	08.09.2020	crop field	GO	3	Cicadellidae	Empoasca
1394-F7-M	1394	F7	M	08.09.2020	crop field	GO	3	Cicadellidae	Empoasca
1394-F7-M	1394	F7	M	08.09.2020	crop field	GO	3	Cicadellidae	Empoasca	luda
1394-F7-M	1394	F7	M	08.09.2020	crop field	GO	3	Cicadellidae
1394-F7-M	1394	F7	M	08.09.2020	crop field	GO	3	Cicadellidae	Empoasca	luda
1394-F7-M	1394	F7	M	08.09.2020	crop field	GO	3	Cicadellidae	Empoasca
1393-F7-W	1393	F7	W	08.09.2020	crop field	GO	3	Cicadellidae	Cicadella	viridis
1393-F7-W	1393	F7	W	08.09.2020	crop field	GO	3	Cicadellidae	Eupteryx	atropunctata
1393-F7-W	1393	F7	W	08.09.2020	crop field	GO	3	Cicadellidae	Empoasca
1393-F7-W	1393	F7	W	08.09.2020	crop field	GO	3	Cicadellidae
1393-F7-W	1393	F7	W	08.09.2020	crop field	GO	3	Delphacidae	Laodelphax
1393-F7-W	1393	F7	W	08.09.2020	crop field	GO	3	Cicadellidae	Macrosteles
1393-F7-W	1393	F7	W	08.09.2020	crop field	GO	3	Cicadellidae	Empoasca
1393-F7-W	1393	F7	W	08.09.2020	crop field	GO	3	Cicadellidae	Orientus	ishidae
1393-F7-W	1393	F7	W	08.09.2020	crop field	GO	3	Cicadellidae	Empoasca
1393-F7-W	1393	F7	W	08.09.2020	crop field	GO	3	Cicadellidae	Empoasca	luda
1393-F7-W	1393	F7	W	08.09.2020	crop field	GO	3	Cicadellidae	Eupteryx
1393-F7-W	1393	F7	W	08.09.2020	crop field	GO	3	Cicadellidae	Fagocyba	douglasi
1393-F7-W	1393	F7	W	08.09.2020	crop field	GO	3	Cicadellidae	Cicadella
1393-F7-W	1393	F7	W	08.09.2020	crop field	GO	3	Cicadellidae	Typhlocyba
1393-F7-W	1393	F7	W	08.09.2020	crop field	GO	3	Cicadellidae	Ribautiana	debilis
1393-F7-W	1393	F7	W	08.09.2020	crop field	GO	3	Cicadellidae
1396-F8-M	1396	F8	M	08.09.2020	crop field	GO	3	Cicadellidae
1396-F8-M	1396	F8	M	08.09.2020	crop field	GO	3	Cicadellidae	Macrosteles
1396-F8-M	1396	F8	M	08.09.2020	crop field	GO	3	Cicadellidae	Cicadella	viridis
1396-F8-M	1396	F8	M	08.09.2020	crop field	GO	3	Cicadellidae	Psammotettix
1396-F8-M	1396	F8	M	08.09.2020	crop field	GO	3	Delphacidae
1396-F8-M	1396	F8	M	08.09.2020	crop field	GO	3	Cicadellidae	Empoasca
1396-F8-M	1396	F8	M	08.09.2020	crop field	GO	3	Cicadellidae	Empoasca	luda
1396-F8-M	1396	F8	M	08.09.2020	crop field	GO	3	Cicadellidae
1396-F8-M	1396	F8	M	08.09.2020	crop field	GO	3	Cicadellidae
1396-F8-M	1396	F8	M	08.09.2020	crop field	GO	3	Cicadellidae
1395-F8-W	1395	F8	W	08.09.2020	crop field	GO	3	Cicadellidae
1395-F8-W	1395	F8	W	08.09.2020	crop field	GO	3	Cicadellidae	Psammotettix
1395-F8-W	1395	F8	W	08.09.2020	crop field	GO	3	Cicadellidae	Macrosteles
1395-F8-W	1395	F8	W	08.09.2020	crop field	GO	3	Cicadellidae	Cicadella	viridis
1395-F8-W	1395	F8	W	08.09.2020	crop field	GO	3	Cicadellidae
1395-F8-W	1395	F8	W	08.09.2020	crop field	GO	3	Delphacidae	Laodelphax
1395-F8-W	1395	F8	W	08.09.2020	crop field	GO	3	Cicadellidae
1395-F8-W	1395	F8	W	08.09.2020	crop field	GO	3	Cicadellidae	Eupteryx	atropunctata
1395-F8-W	1395	F8	W	08.09.2020	crop field	GO	3	Cicadellidae
1395-F8-W	1395	F8	W	08.09.2020	crop field	GO	3	Cicadellidae
1398-F9-M	1398	F9	M	08.09.2020	crop field	GO	3	Cicadellidae	Psammotettix
1398-F9-M	1398	F9	M	08.09.2020	crop field	GO	3	Cicadellidae	Cicadella	viridis
1398-F9-M	1398	F9	M	08.09.2020	crop field	GO	3	Cicadellidae
1398-F9-M	1398	F9	M	08.09.2020	crop field	GO	3	Cicadellidae	Eupteryx	atropunctata
1398-F9-M	1398	F9	M	08.09.2020	crop field	GO	3	Cicadellidae	Macrosteles
1398-F9-M	1398	F9	M	08.09.2020	crop field	GO	3	Delphacidae	Laodelphax
1398-F9-M	1398	F9	M	08.09.2020	crop field	GO	3	Cicadellidae
1397-F9-W	1397	F9	W	08.09.2020	crop field	GO	3	Cicadellidae	Empoasca
1397-F9-W	1397	F9	W	08.09.2020	crop field	GO	3	Cicadellidae	Macrosteles
1397-F9-W	1397	F9	W	08.09.2020	crop field	GO	3	Cicadellidae	Empoasca	luda
1397-F9-W	1397	F9	W	08.09.2020	crop field	GO	3	Cicadellidae	Eupteryx	atropunctata
1397-F9-W	1397	F9	W	08.09.2020	crop field	GO	3	Cicadellidae	Psammotettix
1397-F9-W	1397	F9	W	08.09.2020	crop field	GO	3	Delphacidae	Laodelphax
1397-F9-W	1397	F9	W	08.09.2020	crop field	GO	3	Cicadellidae	Empoasca
1400-F10-M	1400	F10	M	08.09.2020	crop field	GO	3	Cicadellidae	Eupteryx	atropunctata
1400-F10-M	1400	F10	M	08.09.2020	crop field	GO	3	Cicadellidae
1400-F10-M	1400	F10	M	08.09.2020	crop field	GO	3	Cicadellidae	Macrosteles
1400-F10-M	1400	F10	M	08.09.2020	crop field	GO	3	Cicadellidae	Empoasca	luda
1400-F10-M	1400	F10	M	08.09.2020	crop field	GO	3	Cicadellidae	Empoasca
1400-F10-M	1400	F10	M	08.09.2020	crop field	GO	3	Cicadellidae	Typhlocyba	rosae
1400-F10-M	1400	F10	M	08.09.2020	crop field	GO	3	Cicadellidae
1399-F10-W	1399	F10	W	08.09.2020	crop field	GO	3	Cicadellidae	Eupteryx	atropunctata
1399-F10-W	1399	F10	W	08.09.2020	crop field	GO	3	Cicadellidae
1399-F10-W	1399	F10	W	08.09.2020	crop field	GO	3	Cicadellidae	Empoasca
1399-F10-W	1399	F10	W	08.09.2020	crop field	GO	3	Cicadellidae	Psammotettix
1399-F10-W	1399	F10	W	08.09.2020	crop field	GO	3	Delphacidae	Laodelphax
1399-F10-W	1399	F10	W	08.09.2020	crop field	GO	3	Cicadellidae	Empoasca
1399-F10-W	1399	F10	W	08.09.2020	crop field	GO	3	Cicadellidae
1202-F1-M	1202	F1	M	27.08.2020	crop field	LA	3	Cicadellidae
1202-F1-M	1202	F1	M	27.08.2020	crop field	LA	3	Cicadellidae	Eupteryx	atropunctata
1202-F1-M	1202	F1	M	27.08.2020	crop field	LA	3	Cicadellidae	Empoasca
1202-F1-M	1202	F1	M	27.08.2020	crop field	LA	3	Cicadellidae	Psammotettix
1202-F1-M	1202	F1	M	27.08.2020	crop field	LA	3	Cicadellidae	Grypotes	puncticollis
1202-F1-M	1202	F1	M	27.08.2020	crop field	LA	3	Cicadellidae	Empoasca
1202-F1-M	1202	F1	M	27.08.2020	crop field	LA	3	Cicadellidae
1202-F1-M	1202	F1	M	27.08.2020	crop field	LA	3	Cicadellidae	Macrosteles
1201-F1-W	1201	F1	W	27.08.2020	crop field	LA	3	Cicadellidae
1201-F1-W	1201	F1	W	27.08.2020	crop field	LA	3	Cicadellidae	Psammotettix
1201-F1-W	1201	F1	W	27.08.2020	crop field	LA	3	Cicadellidae	Empoasca
1201-F1-W	1201	F1	W	27.08.2020	crop field	LA	3	Delphacidae
1201-F1-W	1201	F1	W	27.08.2020	crop field	LA	3	Cicadellidae
1201-F1-W	1201	F1	W	27.08.2020	crop field	LA	3	Cicadellidae	Empoasca
1201-F1-W	1201	F1	W	27.08.2020	crop field	LA	3	Cicadellidae	Empoasca
1204-F2-M	1204	F2	M	27.08.2020	crop field	LA	3	Cicadellidae	Psammotettix
1204-F2-M	1204	F2	M	27.08.2020	crop field	LA	3	Cicadellidae
1204-F2-M	1204	F2	M	27.08.2020	crop field	LA	3	Cicadellidae	Psammotettix
1204-F2-M	1204	F2	M	27.08.2020	crop field	LA	3	Delphacidae	Laodelphax
1204-F2-M	1204	F2	M	27.08.2020	crop field	LA	3	Cicadellidae
1204-F2-M	1204	F2	M	27.08.2020	crop field	LA	3	Cicadellidae	Empoasca
1204-F2-M	1204	F2	M	27.08.2020	crop field	LA	3	Cicadellidae	Psammotettix
1204-F2-M	1204	F2	M	27.08.2020	crop field	LA	3	Cicadellidae
1203-F2-W	1203	F2	W	27.08.2020	crop field	LA	3	Cicadellidae
1203-F2-W	1203	F2	W	27.08.2020	crop field	LA	3	Cicadellidae	Psammotettix
1203-F2-W	1203	F2	W	27.08.2020	crop field	LA	3	Cicadellidae	Aphrodes	diminutus
1203-F2-W	1203	F2	W	27.08.2020	crop field	LA	3	Cicadellidae	Cicadella	viridis
1203-F2-W	1203	F2	W	27.08.2020	crop field	LA	3	Cicadellidae
1203-F2-W	1203	F2	W	27.08.2020	crop field	LA	3	Delphacidae	Laodelphax
1203-F2-W	1203	F2	W	27.08.2020	crop field	LA	3	Cicadellidae	Macrosteles
1203-F2-W	1203	F2	W	27.08.2020	crop field	LA	3	Cicadellidae	Empoasca
1203-F2-W	1203	F2	W	27.08.2020	crop field	LA	3	Delphacidae
1203-F2-W	1203	F2	W	27.08.2020	crop field	LA	3	Cicadellidae	Empoasca	decipiens
1206-F3-M	1206	F3	M	27.08.2020	crop field	LA	3	Cicadellidae	Psammotettix
1206-F3-M	1206	F3	M	27.08.2020	crop field	LA	3	Cicadellidae
1206-F3-M	1206	F3	M	27.08.2020	crop field	LA	3	Delphacidae	Laodelphax
1206-F3-M	1206	F3	M	27.08.2020	crop field	LA	3	Cicadellidae	Macrosteles
1206-F3-M	1206	F3	M	27.08.2020	crop field	LA	3	Cicadellidae	Eupteryx	atropunctata
1206-F3-M	1206	F3	M	27.08.2020	crop field	LA	3	Cicadellidae	Psammotettix	confinis
1206-F3-M	1206	F3	M	27.08.2020	crop field	LA	3	Cicadellidae
1206-F3-M	1206	F3	M	27.08.2020	crop field	LA	3	Cicadellidae	Psammotettix	confinis
1205-F3-W	1205	F3	W	27.08.2020	crop field	LA	3	Cicadellidae
1205-F3-W	1205	F3	W	27.08.2020	crop field	LA	3	Cicadellidae	Psammotettix
1205-F3-W	1205	F3	W	27.08.2020	crop field	LA	3	Delphacidae	Laodelphax
1205-F3-W	1205	F3	W	27.08.2020	crop field	LA	3	Cicadellidae	Eupteryx	atropunctata
1205-F3-W	1205	F3	W	27.08.2020	crop field	LA	3	Cicadellidae
1205-F3-W	1205	F3	W	27.08.2020	crop field	LA	3	Cicadellidae	Empoasca
1208-F4-M	1208	F4	M	27.08.2020	crop field	LA	3	Cicadellidae
1208-F4-M	1208	F4	M	27.08.2020	crop field	LA	3	Cicadellidae	Psammotettix
1208-F4-M	1208	F4	M	27.08.2020	crop field	LA	3	Cicadellidae	Macrosteles
1208-F4-M	1208	F4	M	27.08.2020	crop field	LA	3	Cicadellidae
1208-F4-M	1208	F4	M	27.08.2020	crop field	LA	3	Cicadellidae	Grypotes	puncticollis
1208-F4-M	1208	F4	M	27.08.2020	crop field	LA	3	Cicadellidae	Eupteryx	atropunctata
1208-F4-M	1208	F4	M	27.08.2020	crop field	LA	3	Cicadellidae	Eupteryx	atropunctata
1208-F4-M	1208	F4	M	27.08.2020	crop field	LA	3	Cicadellidae
1208-F4-M	1208	F4	M	27.08.2020	crop field	LA	3	Cicadellidae
1208-F4-M	1208	F4	M	27.08.2020	crop field	LA	3	Cicadellidae	Eupteryx
1208-F4-M	1208	F4	M	27.08.2020	crop field	LA	3	Delphacidae	Laodelphax
1207-F4-W	1207	F4	W	27.08.2020	crop field	LA	3	Cicadellidae
1207-F4-W	1207	F4	W	27.08.2020	crop field	LA	3	Delphacidae	Laodelphax
1207-F4-W	1207	F4	W	27.08.2020	crop field	LA	3	Cicadellidae	Empoasca
1207-F4-W	1207	F4	W	27.08.2020	crop field	LA	3	Cicadellidae	Macrosteles
1207-F4-W	1207	F4	W	27.08.2020	crop field	LA	3	Cicadellidae	Psammotettix
1207-F4-W	1207	F4	W	27.08.2020	crop field	LA	3	Cicadellidae
1210-F5-M	1210	F5	M	27.08.2020	crop field	LA	3	Cicadellidae	Psammotettix
1210-F5-M	1210	F5	M	27.08.2020	crop field	LA	3	Cicadellidae
1209-F5-W	1209	F5	W	27.08.2020	crop field	LA	3	Cicadellidae	Grypotes	puncticollis
1209-F5-W	1209	F5	W	27.08.2020	crop field	LA	3	Cicadellidae
1209-F5-W	1209	F5	W	27.08.2020	crop field	LA	3	Cicadellidae	Psammotettix
1209-F5-W	1209	F5	W	27.08.2020	crop field	LA	3	Cicadellidae	Macrosteles
1209-F5-W	1209	F5	W	27.08.2020	crop field	LA	3	Cicadellidae	Psammotettix
1209-F5-W	1209	F5	W	27.08.2020	crop field	LA	3	Cicadellidae	Empoasca
1209-F5-W	1209	F5	W	27.08.2020	crop field	LA	3	Cicadellidae	Empoasca
1212-F6-M	1212	F6	M	27.08.2020	crop field	LA	3	Cicadellidae	Psammotettix
1212-F6-M	1212	F6	M	27.08.2020	crop field	LA	3	Cicadellidae
1212-F6-M	1212	F6	M	27.08.2020	crop field	LA	3	Cicadellidae	Empoasca	luda
1212-F6-M	1212	F6	M	27.08.2020	crop field	LA	3	Cicadellidae	Psammotettix
1212-F6-M	1212	F6	M	27.08.2020	crop field	LA	3	Cicadellidae
1212-F6-M	1212	F6	M	27.08.2020	crop field	LA	3	Cicadellidae	Macrosteles
1211-F6-W	1211	F6	W	27.08.2020	crop field	LA	3	Cicadellidae
1211-F6-W	1211	F6	W	27.08.2020	crop field	LA	3	Cicadellidae	Empoasca
1211-F6-W	1211	F6	W	27.08.2020	crop field	LA	3	Cicadellidae	Grypotes	puncticollis
1211-F6-W	1211	F6	W	27.08.2020	crop field	LA	3	Cicadellidae	Psammotettix
1211-F6-W	1211	F6	W	27.08.2020	crop field	LA	3	Delphacidae	Laodelphax
1211-F6-W	1211	F6	W	27.08.2020	crop field	LA	3	Cicadellidae
1211-F6-W	1211	F6	W	27.08.2020	crop field	LA	3	Cicadellidae
1211-F6-W	1211	F6	W	27.08.2020	crop field	LA	3	Cicadellidae
1214-F7-M	1214	F7	M	27.08.2020	crop field	LA	3	Cicadellidae	Macrosteles	sexnotatus
1214-F7-M	1214	F7	M	27.08.2020	crop field	LA	3	Cicadellidae	Macrosteles
1214-F7-M	1214	F7	M	27.08.2020	crop field	LA	3	Cicadellidae
1214-F7-M	1214	F7	M	27.08.2020	crop field	LA	3	Cicadellidae
1213-F7-W	1213	F7	W	27.08.2020	crop field	LA	3	Delphacidae	Dicranotropis	hamata
1213-F7-W	1213	F7	W	27.08.2020	crop field	LA	3	Cicadellidae
1213-F7-W	1213	F7	W	27.08.2020	crop field	LA	3	Delphacidae
1216-F8-M	1216	F8	M	27.08.2020	crop field	LA	3	Cicadellidae	Macrosteles
1216-F8-M	1216	F8	M	27.08.2020	crop field	LA	3	Cicadellidae	Psammotettix
1216-F8-M	1216	F8	M	27.08.2020	crop field	LA	3	Cicadellidae	Psammotettix
1216-F8-M	1216	F8	M	27.08.2020	crop field	LA	3	Cicadellidae	Eupteryx	atropunctata
1216-F8-M	1216	F8	M	27.08.2020	crop field	LA	3	Cicadellidae
1216-F8-M	1216	F8	M	27.08.2020	crop field	LA	3	Cicadellidae	Forcipata
1215-F8-W	1215	F8	W	27.08.2020	crop field	LA	3	Cicadellidae	Eupteryx	atropunctata
1215-F8-W	1215	F8	W	27.08.2020	crop field	LA	3	Delphacidae	Laodelphax
1215-F8-W	1215	F8	W	27.08.2020	crop field	LA	3	Cicadellidae
1215-F8-W	1215	F8	W	27.08.2020	crop field	LA	3	Cicadellidae	Macrosteles
1215-F8-W	1215	F8	W	27.08.2020	crop field	LA	3	Cicadellidae	Empoasca	luda
1215-F8-W	1215	F8	W	27.08.2020	crop field	LA	3	Cicadellidae	Empoasca	luda
1215-F8-W	1215	F8	W	27.08.2020	crop field	LA	3	Cicadellidae	Psammotettix
1215-F8-W	1215	F8	W	27.08.2020	crop field	LA	3	Cicadellidae	Psammotettix
1215-F8-W	1215	F8	W	27.08.2020	crop field	LA	3	Cicadellidae	Macropsis	ocellata
1215-F8-W	1215	F8	W	27.08.2020	crop field	LA	3	Cicadellidae	Eupteryx	atropunctata
1215-F8-W	1215	F8	W	27.08.2020	crop field	LA	3	Cicadellidae	Eupteryx
1218-F9-M	1218	F9	M	27.08.2020	crop field	LA	3	Cicadellidae	Psammotettix
1218-F9-M	1218	F9	M	27.08.2020	crop field	LA	3	Cicadellidae	Macrosteles
1218-F9-M	1218	F9	M	27.08.2020	crop field	LA	3	Cicadellidae
1218-F9-M	1218	F9	M	27.08.2020	crop field	LA	3	Cicadellidae
1217-F9-W	1217	F9	W	27.08.2020	crop field	LA	3	Cicadellidae	Psammotettix
1217-F9-W	1217	F9	W	27.08.2020	crop field	LA	3	Cicadellidae
1217-F9-W	1217	F9	W	27.08.2020	crop field	LA	3	Delphacidae	Dicranotropis	hamata
1220-F10-M	1220	F10	M	27.08.2002	crop field	LA	3	Cicadellidae	Psammotettix
1220-F10-M	1220	F10	M	27.08.2002	crop field	LA	3	Cicadellidae
1220-F10-M	1220	F10	M	27.08.2002	crop field	LA	3	Cicadellidae	Psammotettix
1220-F10-M	1220	F10	M	27.08.2002	crop field	LA	3	Delphacidae	Laodelphax
1220-F10-M	1220	F10	M	27.08.2002	crop field	LA	3	Cicadellidae
1220-F10-M	1220	F10	M	27.08.2002	crop field	LA	3	Cicadellidae
1220-F10-M	1220	F10	M	27.08.2002	crop field	LA	3	Cicadellidae	Macrosteles
1219-F10-W	1219	F10	W	27.08.2020	crop field	LA	3	Membracidae
1219-F10-W	1219	F10	W	27.08.2020	crop field	LA	3	Cicadellidae
1219-F10-W	1219	F10	W	27.08.2020	crop field	LA	3	Cicadellidae	Eupteryx	atropunctata
1219-F10-W	1219	F10	W	27.08.2020	crop field	LA	3	Cicadellidae	Grypotes	puncticollis
1219-F10-W	1219	F10	W	27.08.2020	crop field	LA	3	Cicadellidae	Psammotettix	confinis
1219-F10-W	1219	F10	W	27.08.2020	crop field	LA	3	Aphrophoridae	Aphrophora	alni
1219-F10-W	1219	F10	W	27.08.2020	crop field	LA	3	Cicadellidae	Macrosteles
1219-F10-W	1219	F10	W	27.08.2020	crop field	LA	3	Cicadellidae	Forcipata
1219-F10-W	1219	F10	W	27.08.2020	crop field	LA	3	Delphacidae	Laodelphax
1219-F10-W	1219	F10	W	27.08.2020	crop field	LA	3	Membracidae	Stictocephala
1219-F10-W	1219	F10	W	27.08.2020	crop field	LA	3	Cicadellidae	Alnetoidia	alneti
1219-F10-W	1219	F10	W	27.08.2020	crop field	LA	3	Cicadellidae
1219-F10-W	1219	F10	W	27.08.2020	crop field	LA	3	Cicadellidae	Eupteryx	atropunctata

## Sheet: TableS2
Table S2. List of samples analyzed for the presence of phytoplasmas and other bacterial pathogens in the class of Mollicutes and Gammaproteobacteria.
Sample code include the sample and site number and an acronym for the position of the Malaise trap. Postion of Malaise trap, M: 20 m from the border for grasslands and the middle of the field for crop fields; W: close to the border of the field.
Sampling period, 1: May/June 2020; 3: August/September 2020
Sample code	# sample	# site	Position of trap	date	Habitat	Region	Sampling period	Phytoplasma	Sequencing result
433-s37-M	433	s37	M	2020-06-03	grassland	VOW	1
721-s37-M	721	s37	M	2020-09-02	grassland	VOW	3
436-s38-M	436	s38	M	2020-06-03	grassland	VOW	1
724-s38-M	724	s38	M	2020-09-02	grassland	VOW	3
439-s39-M	439	s39	M	2020-06-03	grassland	VOW	1
727-s39-M	727	s39	M	2020-09-02	grassland	VOW	3
442-s40-M	442	s40	M	2020-06-03	grassland	VOW	1
730-s40-M	730	s40	M	2020-09-02	grassland	VOW	3
445-s41-M	445	s41	M	2020-06-03	grassland	VOW	1
733-s41-M	733	s41	M	2020-09-02	grassland	VOW	3
448-s42-M	448	s42	M	2020-06-03	grassland	VOW	1
736-s42-M	736	s42	M	2020-09-02	grassland	VOW	3
451-s43-M	451	s43	M	2020-06-03	grassland	VOW	1
739-s43-M	739	s43	M	2020-09-02	grassland	VOW	3
454-s44-M	454	s44	M	2020-06-03	grassland	VOW	1
742-s44-M	742	s44	M	2020-09-02	grassland	VOW	3
457-s45-M	457	s45	M	2020-06-03	grassland	VOW	1
745-s45-M	745	s45	M	2020-09-02	grassland	VOW	3
460-s46-M	460	s46	M	2020-06-03	grassland	VOW	1
748-s46-M	748	s46	M	2020-09-02	grassland	VOW	3
463-s47-M	463	s47	M	2020-06-03	grassland	VOW	1
751-s47-M	751	s47	M	2020-09-02	grassland	VOW	3
466-s48-M	466	s48	M	2020-06-03	grassland	VOW	1
754-s48-M	754	s48	M	2020-09-02	grassland	VOW	3
469-s49-M	469	s49	M	2020-06-03	grassland	VOW	1
757-s49-M	757	s49	M	2020-09-02	grassland	VOW	3
472-s50-M	472	s50	M	2020-06-03	grassland	VOW	1
760-s50-M	760	s50	M	2020-09-02	grassland	VOW	3
475-s51-M	475	s51	M	2020-06-03	grassland	VOW	1
763-s51-M	763	s51	M	2020-09-02	grassland	VOW	3
478-s52-M	478	s52	M	2020-06-03	grassland	VOW	1
766-s52-M	766	s52	M	2020-09-02	grassland	VOW	3
481-s53-M	481	s53	M	2020-06-03	grassland	VOW	1
769-s53-M	769	s53	M	2020-09-02	grassland	VOW	3
484-s54-M	484	s54	M	2020-06-03	grassland	VOW	1
772-s54-M	772	s54	M	2020-09-02	grassland	VOW	3
559-s55-M	559	s55	M	2020-06-12	grassland	CH	1
847-s55-M	847	s55	M	2020-09-11	grassland	CH	3
560-s56-M	560	s56	M	2020-06-12	grassland	CH	1
848-s56-M	848	s56	M	2020-09-11	grassland	CH	3
561-s57-M	561	s57	M	2020-06-12	grassland	CH	1
849-s57-M	849	s57	M	2020-09-11	grassland	CH	3
562-s58-M	562	s58	M	2020-06-12	grassland	CH	1
850-s58-M	850	s58	M	2020-09-11	grassland	CH	3
851-s59-M	851	s59	M	2020-06-12	grassland	CH	3
499-s59-M	499	s59	M	2020-09-11	grassland	CH	1
852-s60-M	852	s60	M	2020-06-12	grassland	CH	3
564-s60-M	564	s60	M	2020-09-11	grassland	CH	1
565-s61-M	565	s61	M	2020-06-12	grassland	CH	1
853-s61-M	853	s61	M	2020-09-11	grassland	CH	3
566-s62-M	566	s62	M	2020-06-12	grassland	CH	1
854-s62-M	854	s62	M	2020-09-11	grassland	CH	3
567-s63-M	567	s63	M	2020-06-12	grassland	CH	1
855-s63-M	855	s63	M	2020-09-11	grassland	CH	3
568-s64-M	568	s64	M	2020-06-12	grassland	CH	1
856-s64-M	856	s64	M	2020-09-11	grassland	CH	3
569-s65-M	569	s65	M	2020-06-12	grassland	CH	1
857-s65-M	857	s65	M	2020-09-11	grassland	CH	3
570-s66-M	570	s66	M	2020-06-12	grassland	CH	1
858-s66-M	858	s66	M	2020-09-11	grassland	CH	3
571-s67-M	571	s67	M	2020-06-12	grassland	CH	1
859-s67-M	859	s67	M	2020-09-11	grassland	CH	3
572-s68-M	572	s68	M	2020-06-12	grassland	CH	1
860-s68-M	860	s68	M	2020-09-11	grassland	CH	3
573-s69-M	573	s69	M	2020-06-12	grassland	CH	1
861-s69-M	861	s69	M	2020-09-11	grassland	CH	3
574-s70-M	574	s70	M	2020-06-12	grassland	CH	1
862-s70-M	862	s70	M	2020-09-11	grassland	CH	3
575-s71-M	575	s71	M	2020-06-12	grassland	CH	1
863-s71-M	863	s71	M	2020-09-11	grassland	CH	3
576-s72-M	576	s72	M	2020-06-12	grassland	CH	1
864-s72-M	864	s72	M	2020-09-11	grassland	CH	3
841-F1-W	841	F1	W	2020-06-03	crop field	LA	1
842-F1-M	842	F1	M	2020-06-03	crop field	LA	1
843-F2-W	843	F2	W	2020-06-03	crop field	LA	1
844-F2-M	844	F2	M	2020-06-03	crop field	LA	1
845-F3-W	845	F3	W	2020-06-03	crop field	LA	1
846-F3-M	846	F3	M	2020-06-03	crop field	LA	1
847-F4-W	847	F4	W	2020-06-03	crop field	LA	1
848-F4-M	848	F4	M	2020-06-03	crop field	LA	1
849-F5-W	849	F5	W	2020-06-03	crop field	LA	1
850-F5-M	850	F5	M	2020-06-03	crop field	LA	1
851-F6-W	851	F6	W	2020-06-03	crop field	LA	1
852-F6-M	852	F6	M	2020-06-03	crop field	LA	1
853-F7-W	853	F7	W	2020-06-03	crop field	LA	1
854-F7-M	854	F7	M	2020-06-03	crop field	LA	1
855-F8-W	855	F8	W	2020-06-03	crop field	LA	1
856-F8-M	856	F8	M	2020-06-03	crop field	LA	1
857-F9-W	857	F9	W	2020-06-03	crop field	LA	1
858-F9-M	858	F9	M	2020-06-03	crop field	LA	1
859-F10-W	859	F10	W	2020-06-03	crop field	LA	1
860-F10-M	860	F10	M	2020-06-03	crop field	LA	1
901-F1-W	901	F1	W	2020-09-06	crop field	GO	1
902-F1-M	902	F1	M	2020-09-06	crop field	GO	1
903-F2-W	903	F2	W	2020-09-06	crop field	GO	1
904-F2-M	904	F2	M	2020-09-06	crop field	GO	1
905-F3-W	905	F3	W	2020-09-06	crop field	GO	1
906-F3-M	906	F3	M	2020-09-06	crop field	GO	1
907-F4-W	907	F4	W	2020-09-06	crop field	GO	1
908-F4-M	908	F4	M	2020-09-06	crop field	GO	1
909-F5-W	909	F5	W	2020-09-06	crop field	GO	1
910-F5-M	910	F5	M	2020-09-06	crop field	GO	1
911-F6-W	911	F6	W	2020-09-06	crop field	GO	1
912-F6-M	912	F6	M	2020-09-06	crop field	GO	1
913-F7-W	913	F7	W	2020-09-06	crop field	GO	1
914-F7-M	914	F7	M	2020-09-06	crop field	GO	1
915-F8-W	915	F8	W	2020-09-06	crop field	GO	1
916-F8-M	916	F8	M	2020-09-06	crop field	GO	1
917-F9-W	917	F9	W	2020-09-06	crop field	GO	1
918-F9-M	918	F9	M	2020-09-06	crop field	GO	1
919-F10-W	919	F10	W	2020-09-06	crop field	GO	1
920-F10-M	920	F10	M	2020-09-06	crop field	GO	1
1201-F1-W	1201	F1	W	2020-08-27	crop field	LA	3
1202-F1-M	1202	F1	M	2020-08-27	crop field	LA	3
1203-F2-W	1203	F2	W	2020-08-27	crop field	LA	3
1204-F2-M	1204	F2	M	2020-08-27	crop field	LA	3
1205-F3-W	1205	F3	W	2020-08-27	crop field	LA	3
1206-F3-M	1206	F3	M	2020-08-27	crop field	LA	3
1207-F4-W	1207	F4	W	2020-08-27	crop field	LA	3
1208-F4-M	1208	F4	M	2020-08-27	crop field	LA	3
1209-F5-W	1209	F5	W	2020-08-27	crop field	LA	3	16SrI-L phytoplasma subgroup	ACCGGAAAGGCATCCTTCTTGTTTTTAAAGACCTAGCAATAGGTATGCTTAGGGAGGAGCTTGCGTCACATTAGTTAGTTGGTGGGGTAAAGGCCTAACAAGACTATGATGTGTAGCCGGGCTGAGAGGTTGAACGGCCACATTGGGACTGAGACACGGCCCAAACTCCTACGGGAGGCAGCAGTAGGGAATTTTCGGCAATGGAGGAAACTCTGACCGAGCAACGCCGCGTGAACGATGAAGTATTTCGGTACGTAAAGTTCTTTTATTAGGGAAGAATAAATGATGGAAAAATCATTCTGACGGTACCTAATGAATAAGCCCCGGCTAACTATGTGCCAGCAGCCGCGGTAATACATAGGGGGCAAGCGTTATCCGGAATTATTGGGCGTAAAGGGT…
1210-F5-M	1210	F5	M	2020-08-27	crop field	LA	3
1211-F6-W	1211	F6	W	2020-08-27	crop field	LA	3
1212-F6-M	1212	F6	M	2020-08-27	crop field	LA	3
1213-F7-W	1213	F7	W	2020-08-27	crop field	LA	3
1214-F7-M	1214	F7	M	2020-08-27	crop field	LA	3
1215-F8-W	1215	F8	W	2020-08-27	crop field	LA	3
1216-F8-M	1216	F8	M	2020-08-27	crop field	LA	3
1217-F9-W	1217	F9	W	2020-08-27	crop field	LA	3
1218-F9-M	1218	F9	M	2020-08-27	crop field	LA	3
1219-F10-W	1219	F10	W	2020-08-27	crop field	LA	3
1220-F10-M	1220	F10	M	2020-08-27	crop field	LA	3
1381-F1-W	1381	F1	W	2020-08-09	crop field	GO	3
1382-F1-M	1382	F1	M	2020-08-09	crop field	GO	3
1383-F2-W	1383	F2	W	2020-08-09	crop field	GO	3
1384-F2-M	1384	F2	M	2020-08-09	crop field	GO	3
1385-F3-W	1385	F3	W	2020-08-09	crop field	GO	3
1386-F3-M	1386	F3	M	2020-08-09	crop field	GO	3
1387-F4-W	1387	F4	W	2020-08-09	crop field	GO	3
1388-F4-M	1388	F4	M	2020-08-09	crop field	GO	3
1389-F5-W	1389	F5	W	2020-08-09	crop field	GO	3
1390-F5-M	1390	F5	M	2020-08-09	crop field	GO	3
1391-F6-W	1391	F6	W	2020-08-09	crop field	GO	3
1392-F6-M	1392	F6	M	2020-08-09	crop field	GO	3
1393-F7-W	1393	F7	W	2020-08-09	crop field	GO	3
1394-F7-M	1394	F7	M	2020-08-09	crop field	GO	3
1395-F8-W	1395	F8	W	2020-08-09	crop field	GO	3
1396-F8-M	1396	F8	M	2020-08-09	crop field	GO	3	16SrI-B phytoplasma subgroup	CACGAAAAGCTCTTTCTTGTTTTTAAAGACCTAGCAATAGGTATGCTTAGGGAGGAGCTTGCGTCACATTAGTTAGTTGGTGGGGTAAAGGCCTACCAAGACTATGATGTGTAGCCGGGCTGAGAGGTTGAACGGCCACATTGGGACTGAGACACGGCCCAAACTCCTACGGGAGGCAGCAGTAGGGAATTTTCGGCAATGGAGGAAACTCTGACCGAGCAACGCCGCGTGAACGATGAAGTATTTCGGTACGTAAAGTTCTTTTATTAGGGAAGAATAAATGATGGAAAAATCATTCTGACGGTACCTAATGAATAAGCCCCGGCTAACTATGTGCCAGCAGCCGCGGTAATACATAGGGGGCAAGCGTTATCCGGAATTATTGGGCGTAAAGGGTGC…
1397-F9-W	1397	F9	W	2020-08-09	crop field	GO	3
1398-F9-M	1398	F9	M	2020-08-09	crop field	GO	3
1399-F10-W	1399	F10	W	2020-08-09	crop field	GO	3
1400-F10-M	1400	F10	M	2020-08-09	crop field	GO	3

## Sheet: TableS3
Table S3. Number of landscape features in the surrounding locations investigated in regions Gloon (GO) and Labber (LA).
Macroarea	Location #	hedgerow	woody	other crops
GO	1	1		4
GO	2		1	3
GO	3	1		4
GO	4	1		4
GO	5	1		4
GO	6		1	3
GO	7	1		4
GO	8		1	3
GO	9	1		4
GO	10			4
LA	1	1	1	3
LA	2		2	2
LA	3		1	3
LA	4	1		4
LA	5	1		4
LA	6	1	1	3
LA	7	1		4
LA	8			4
LA	9	1	1	3
LA	10	1	2	2
